# Supplementary material
Source: PubMed Central journal article supplement (PMC3103601)

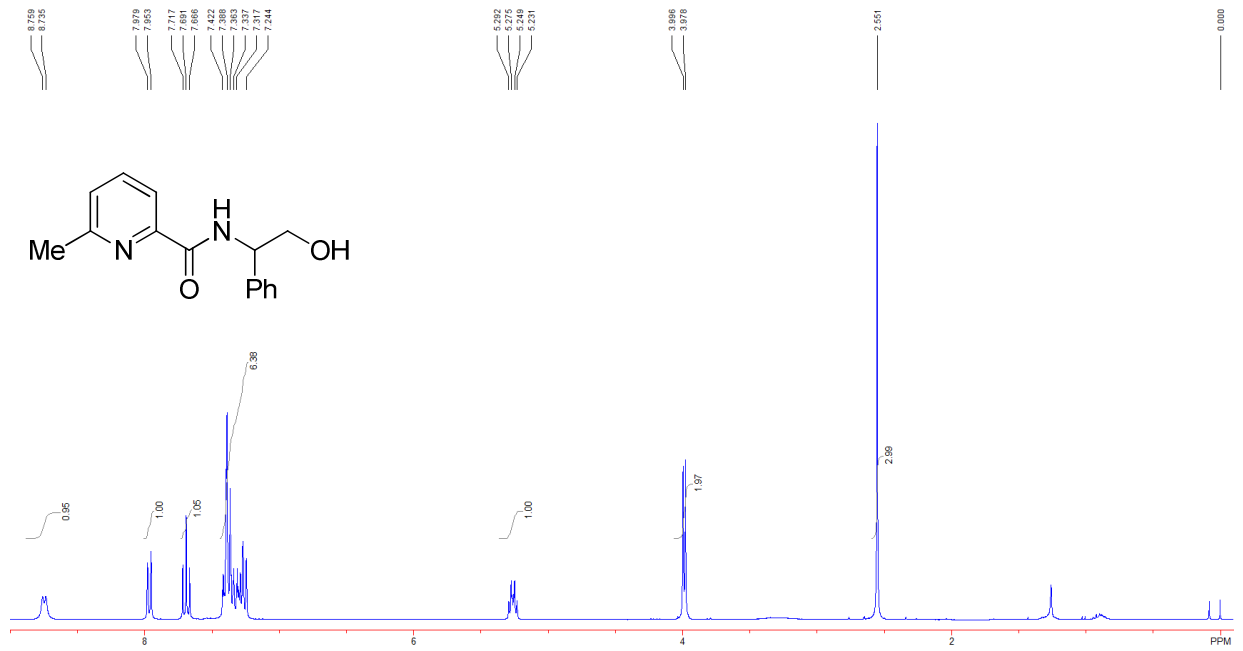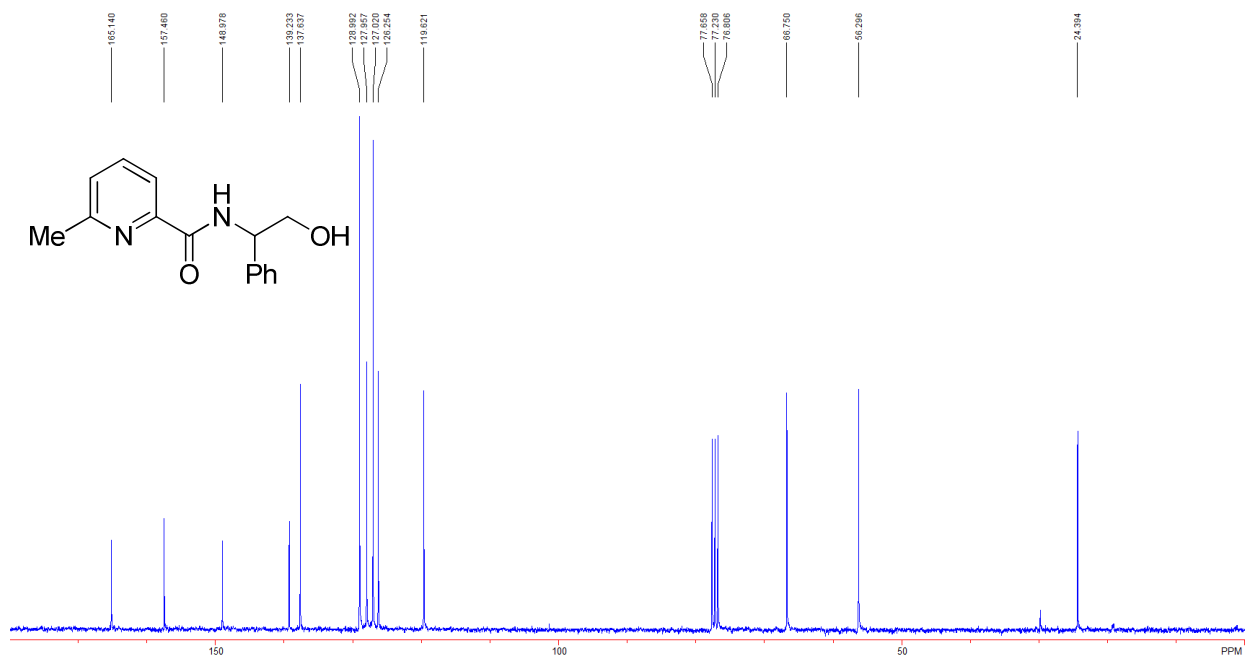

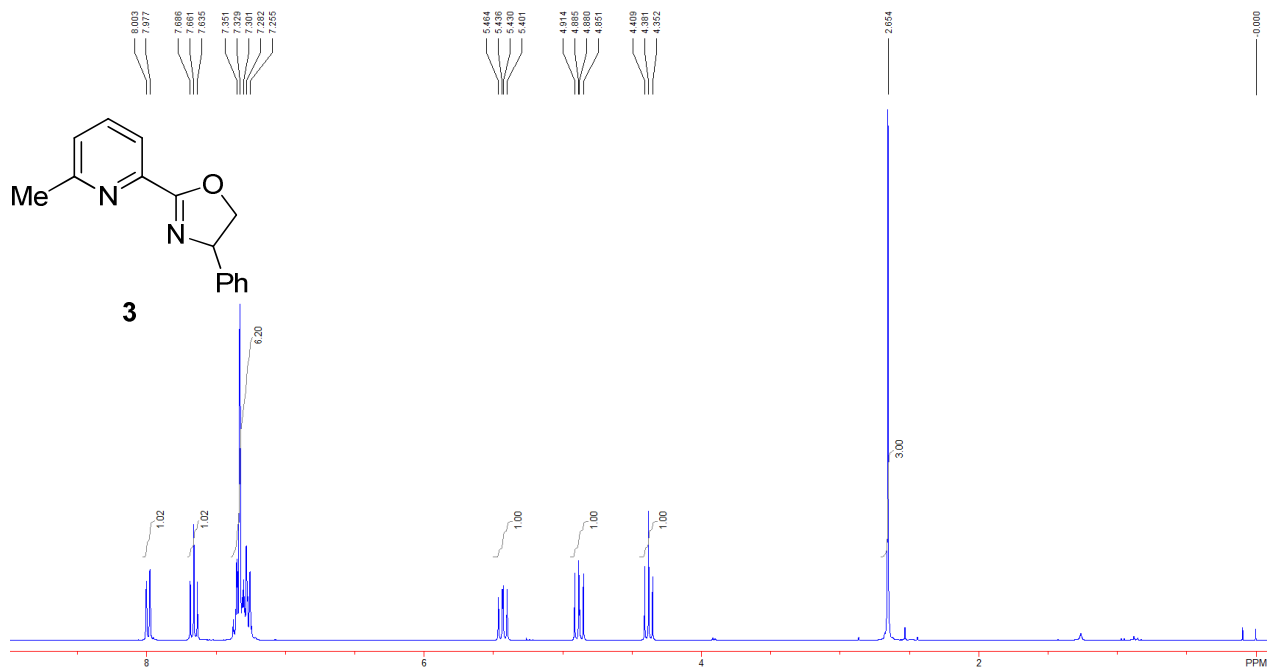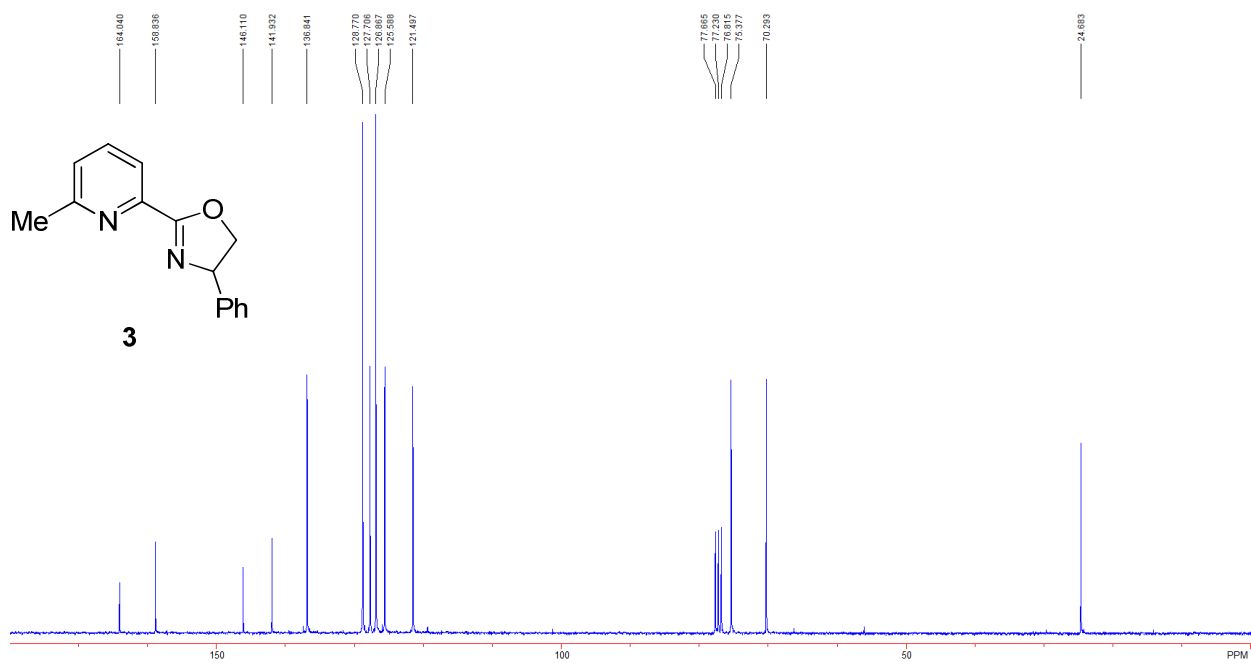

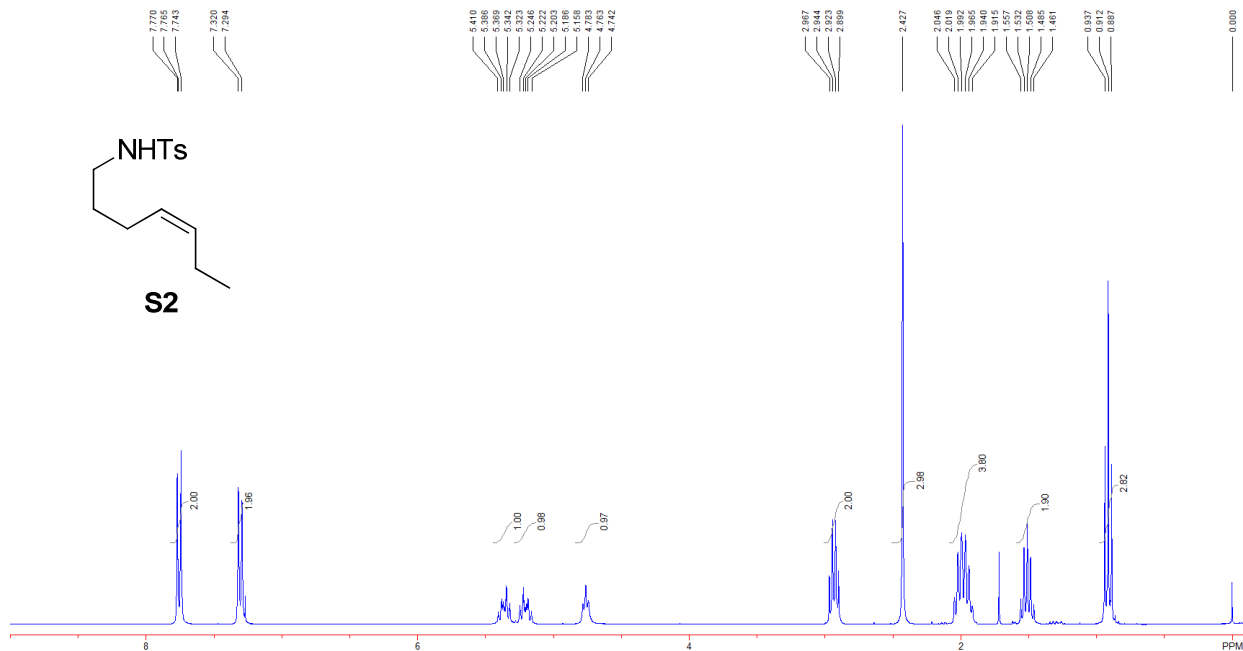

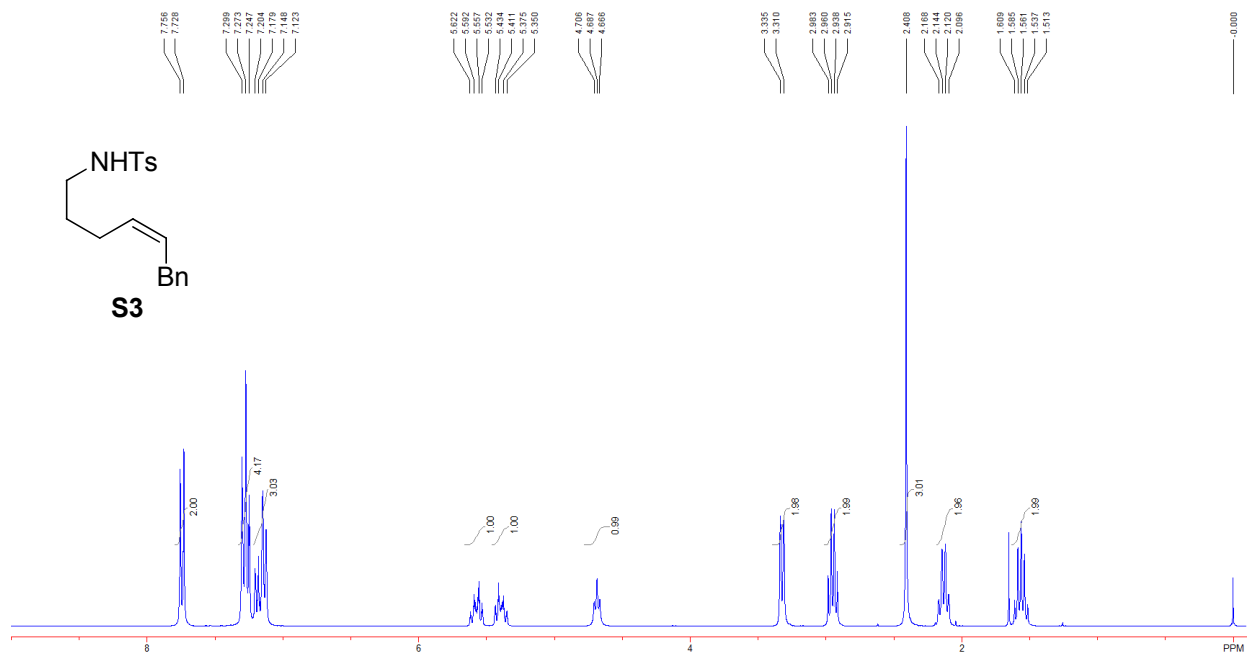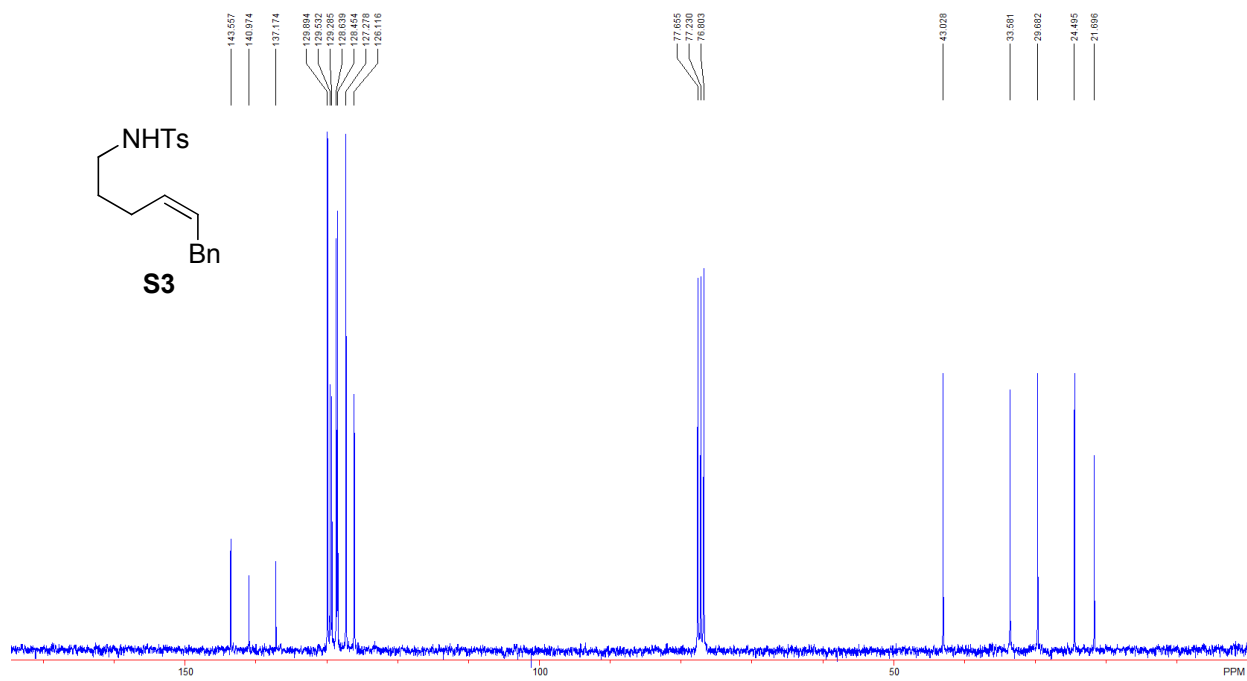

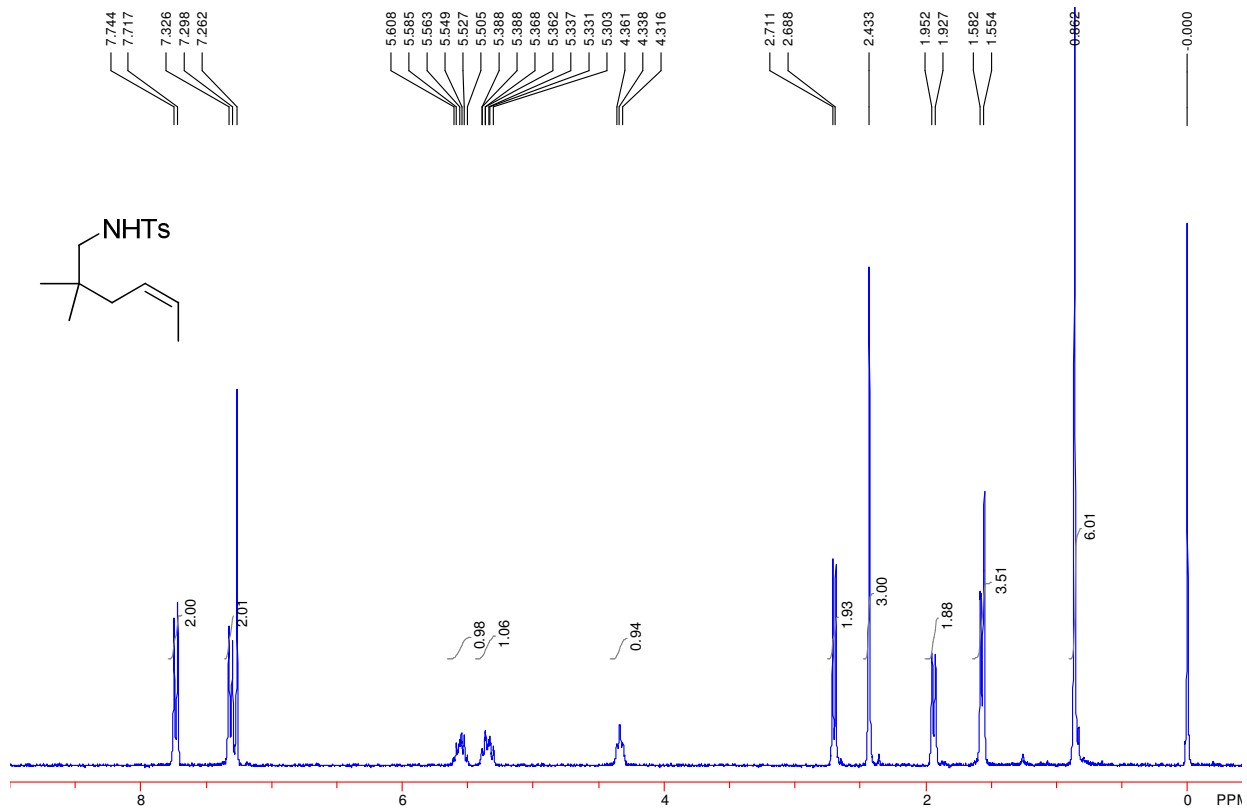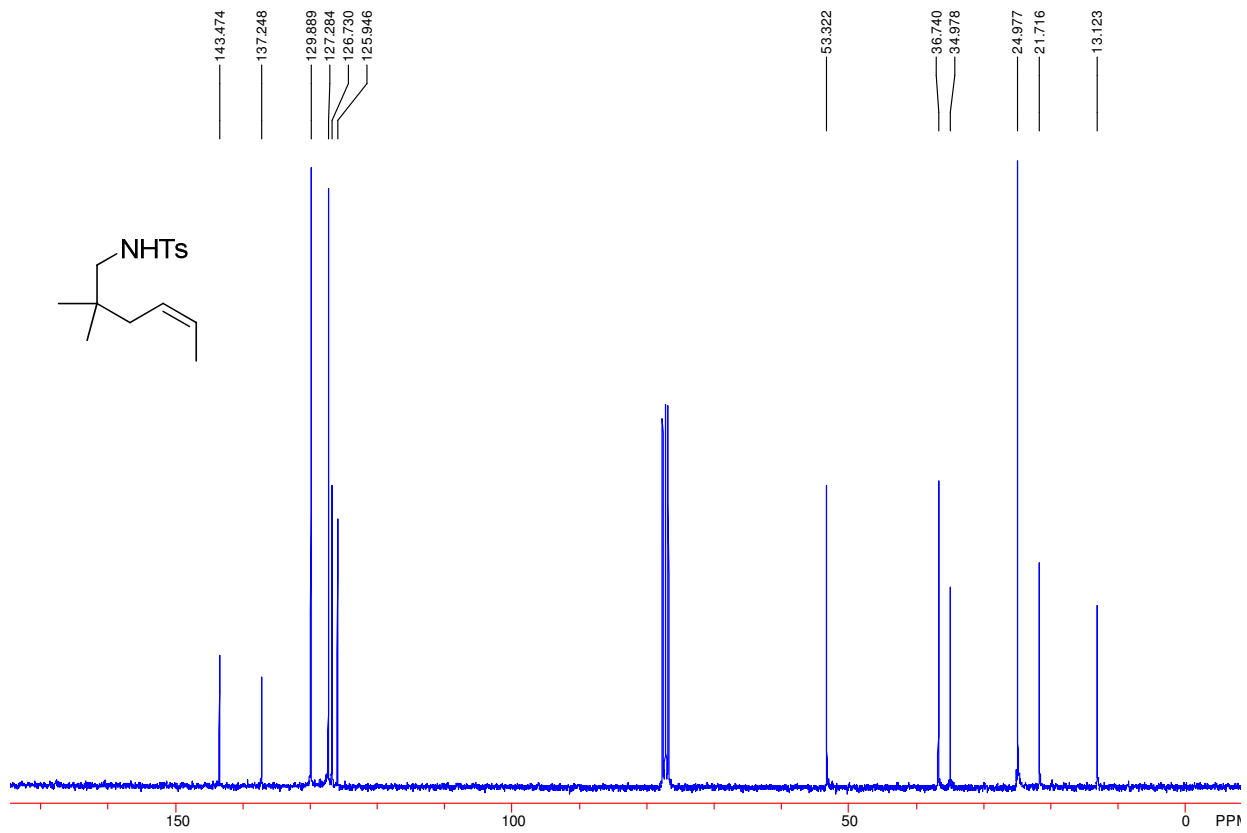

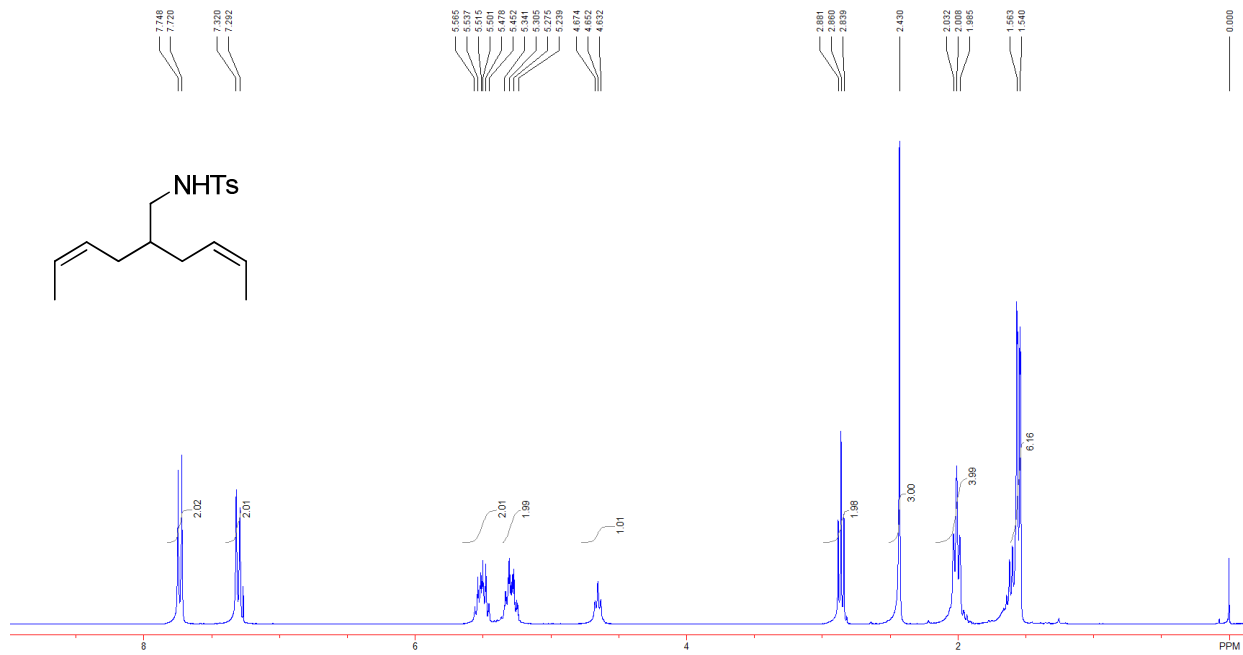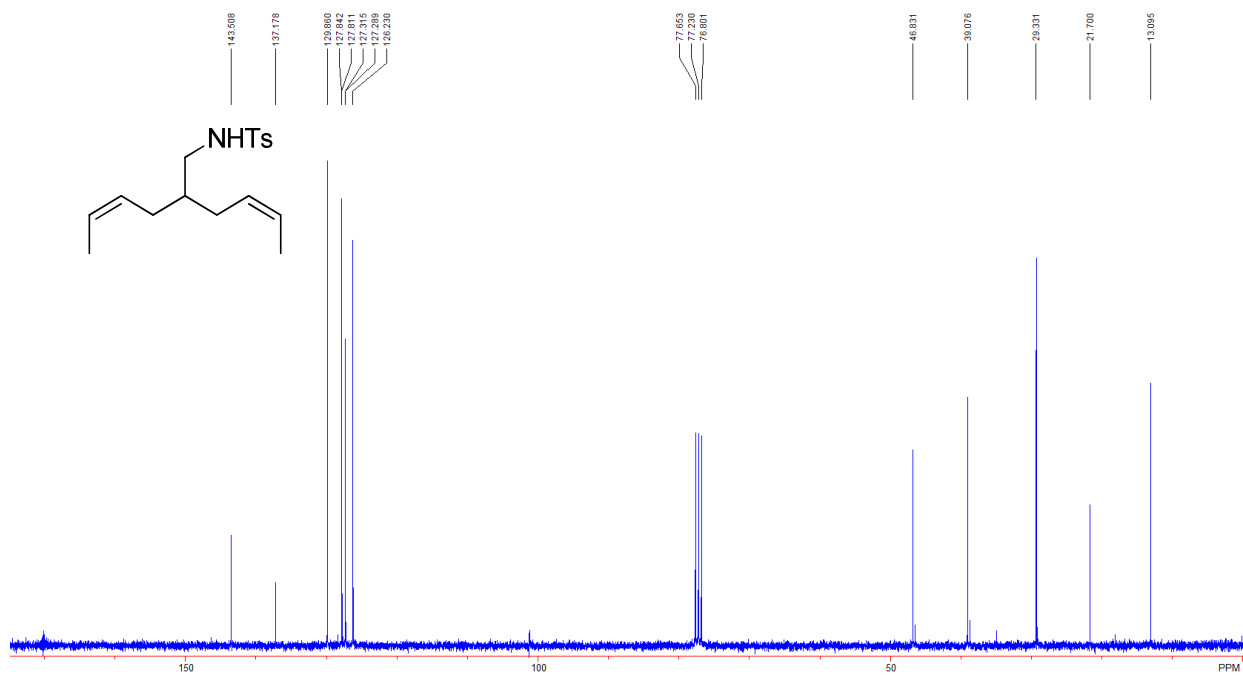

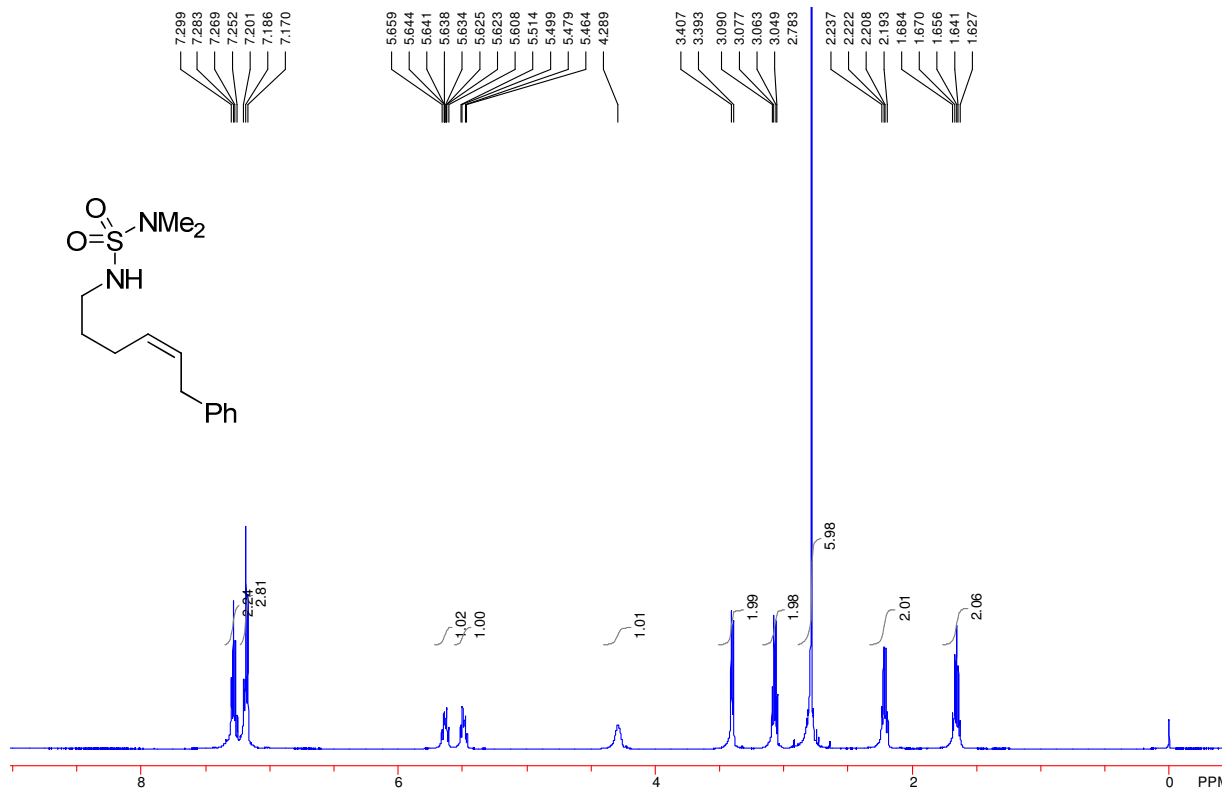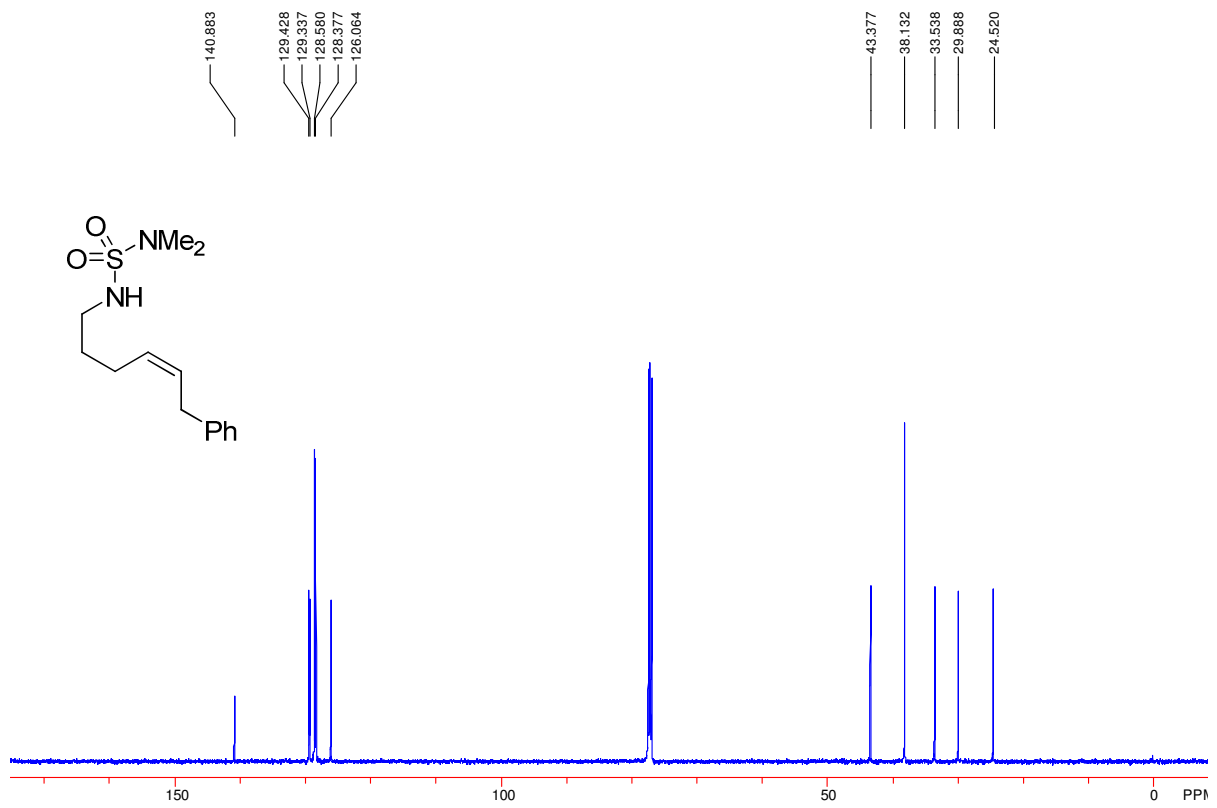

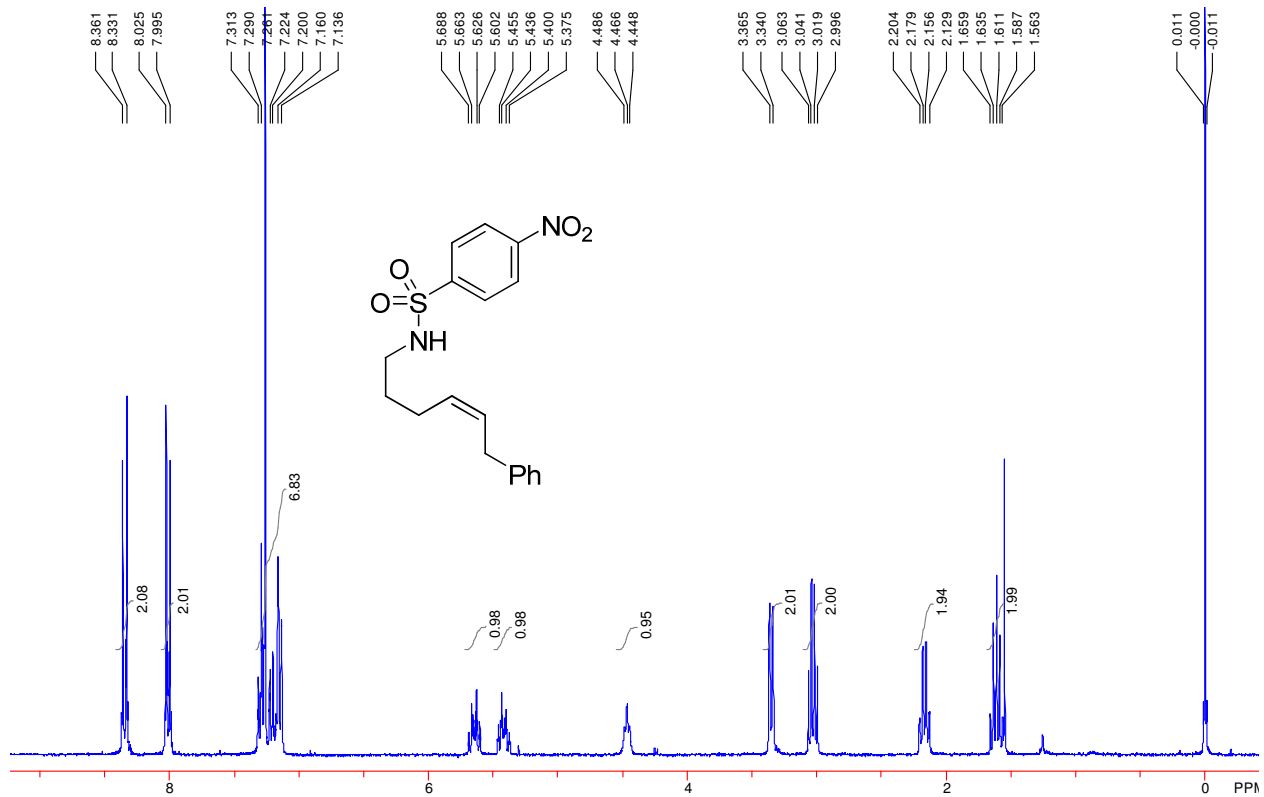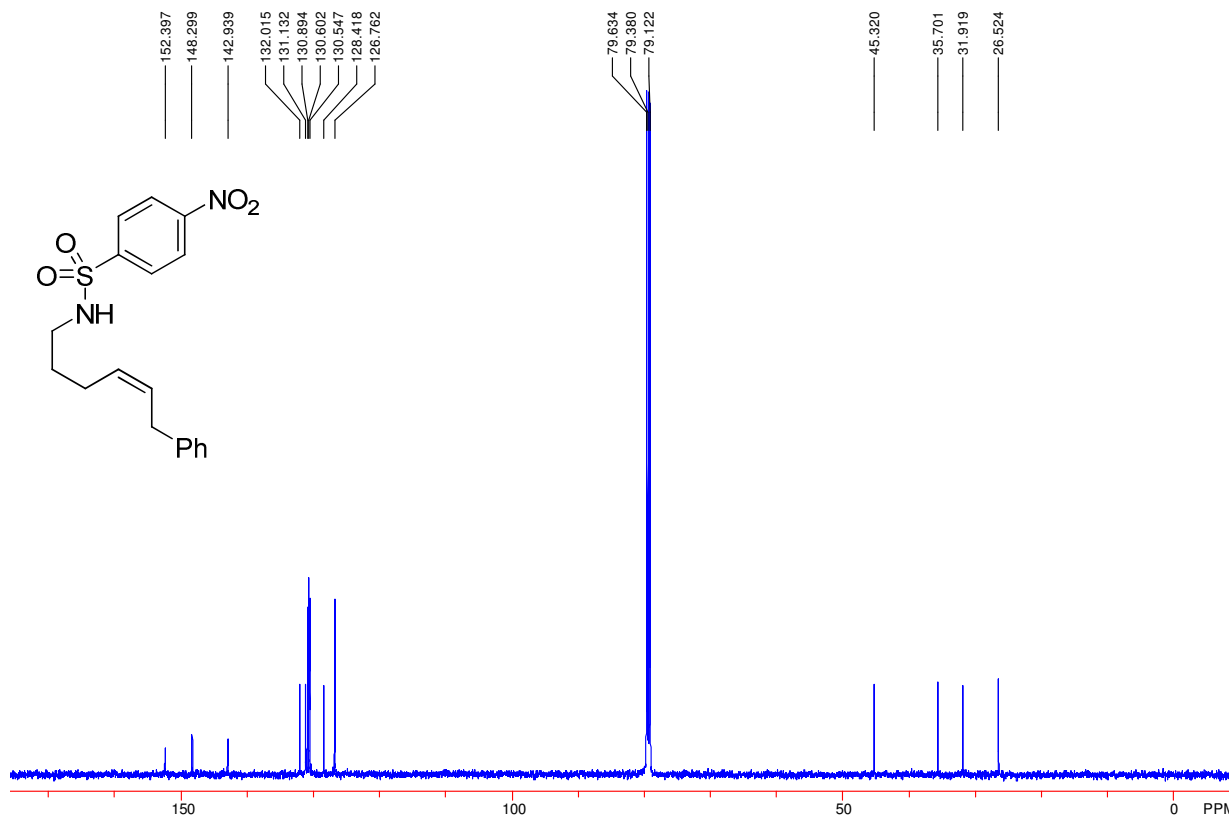



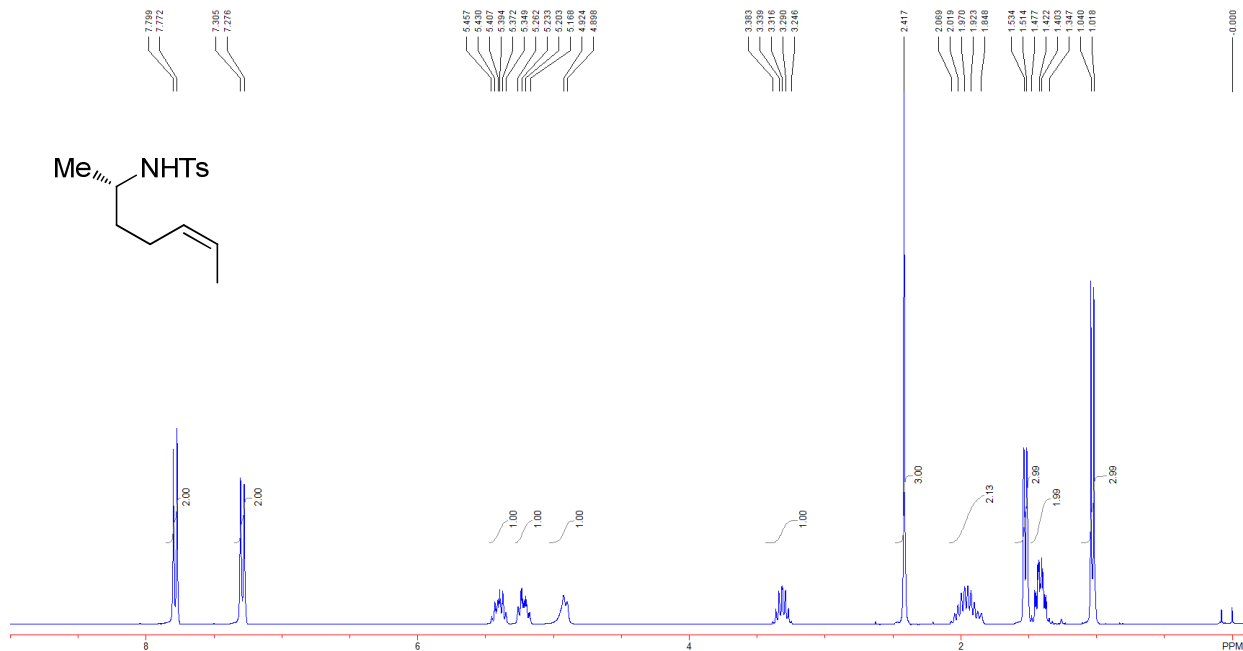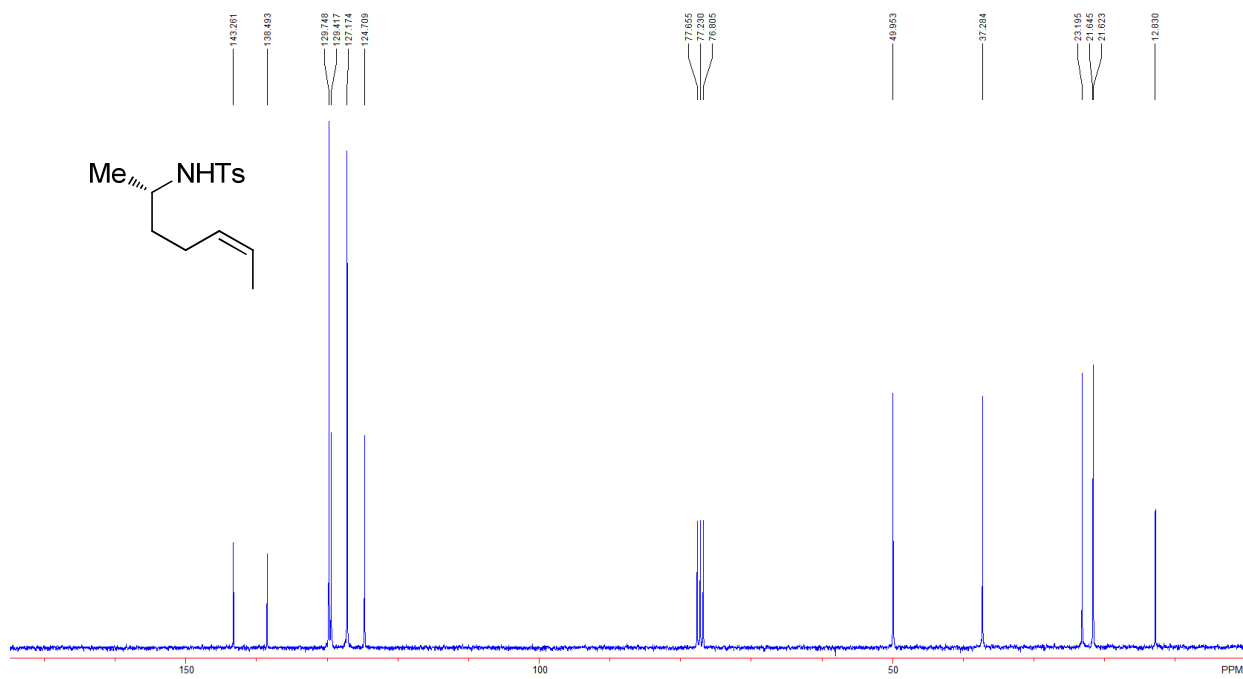



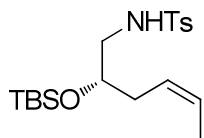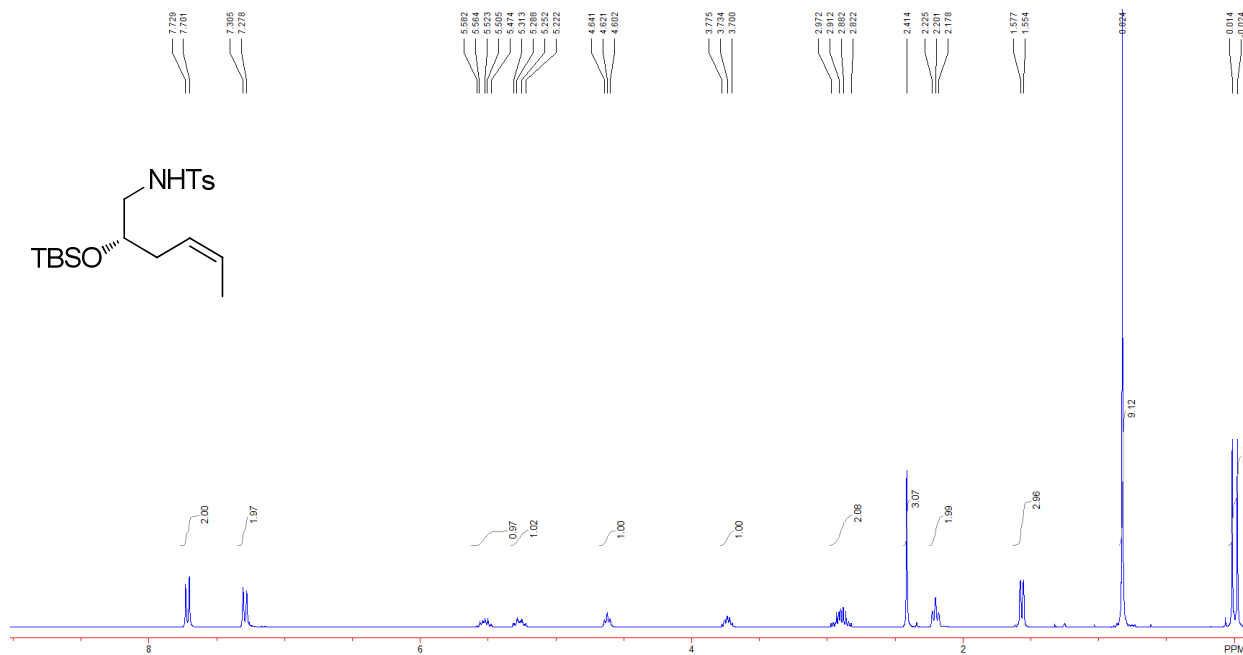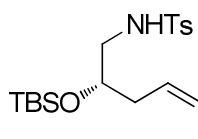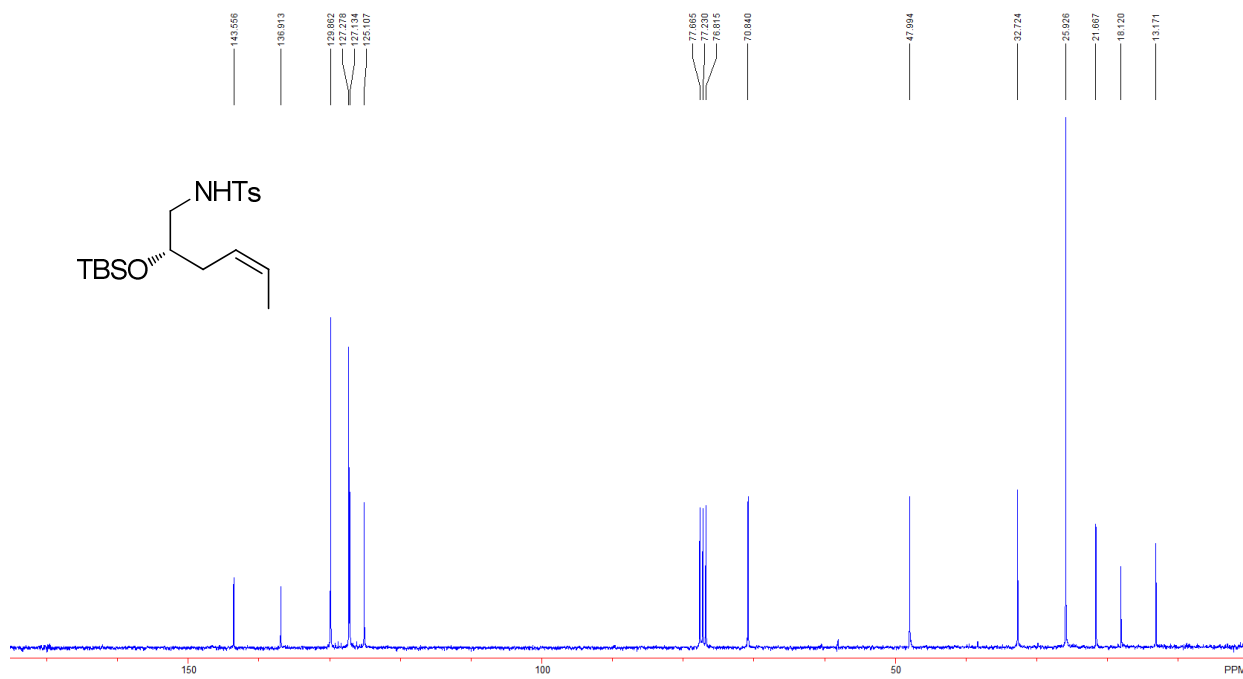

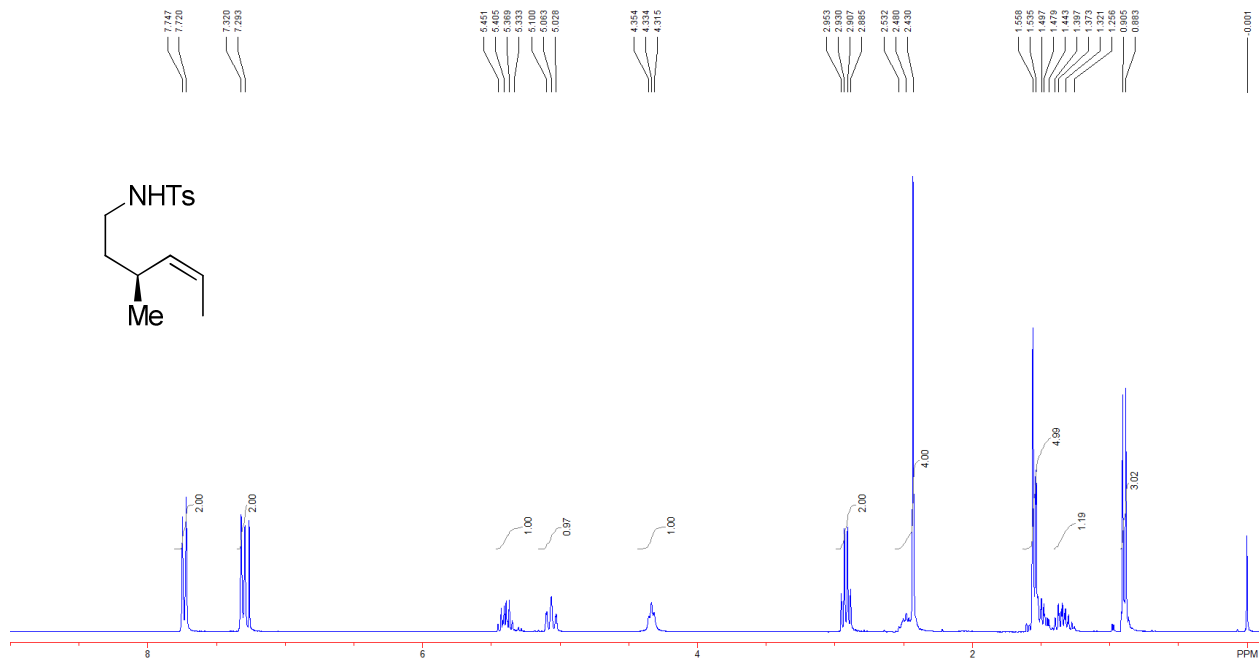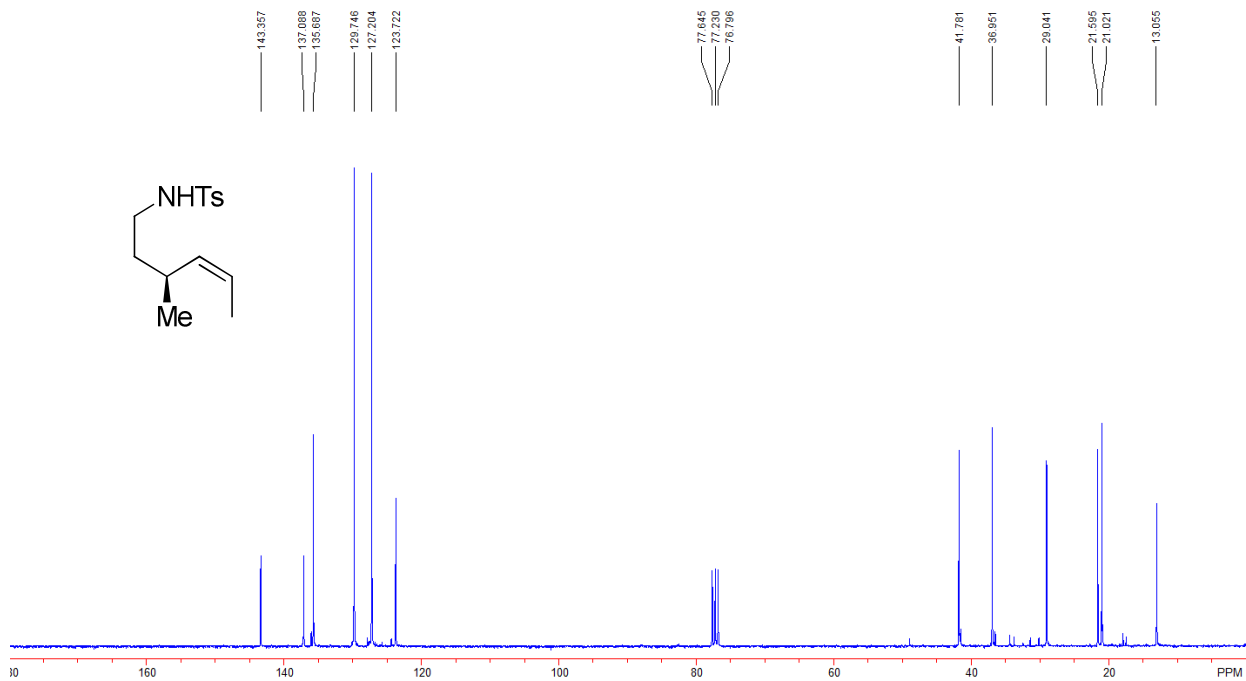

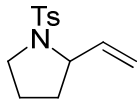

Table 1, Entry 1

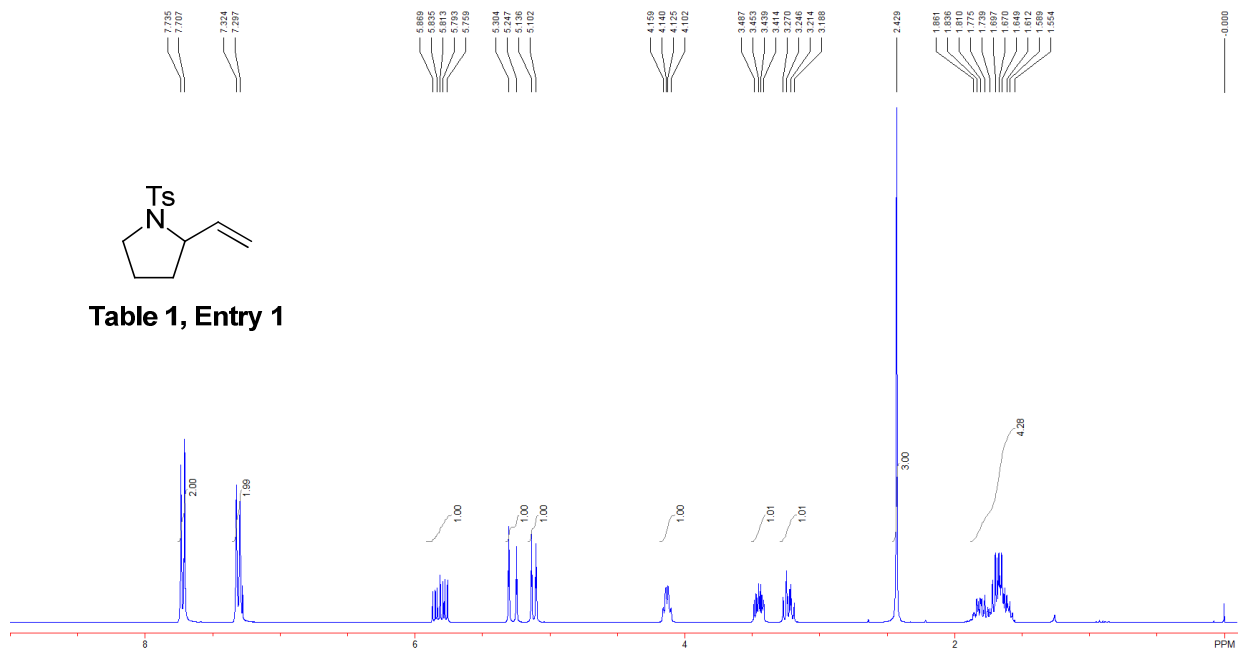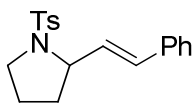

Table 1, Entry 3

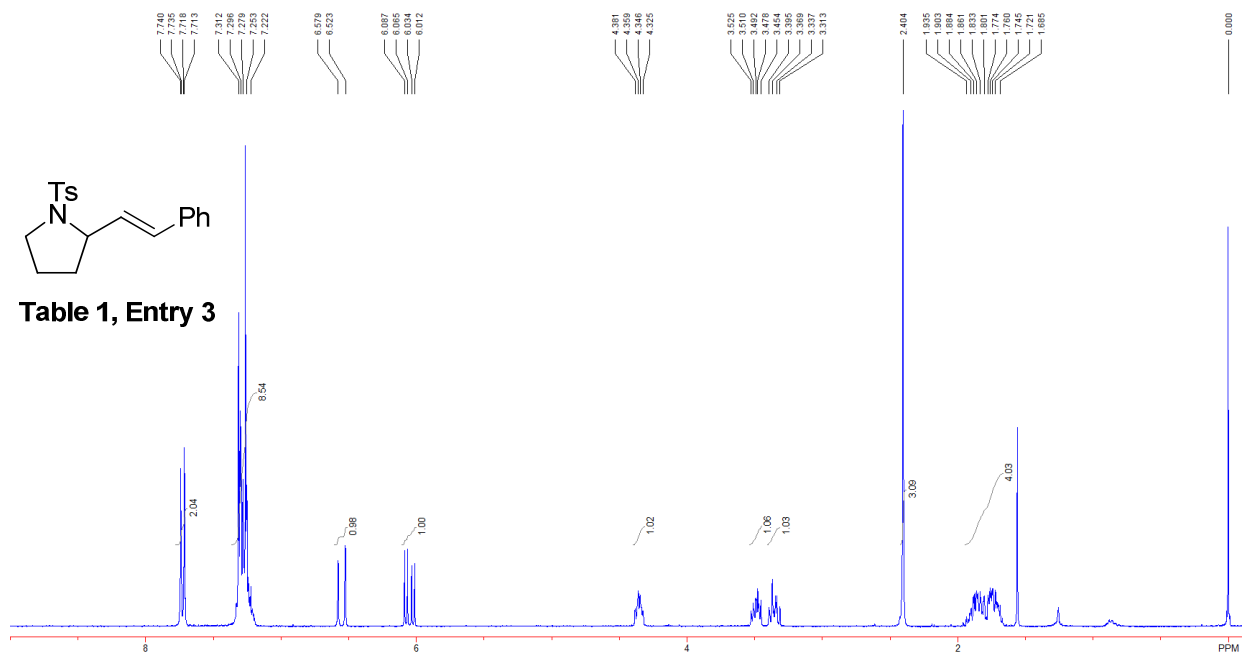

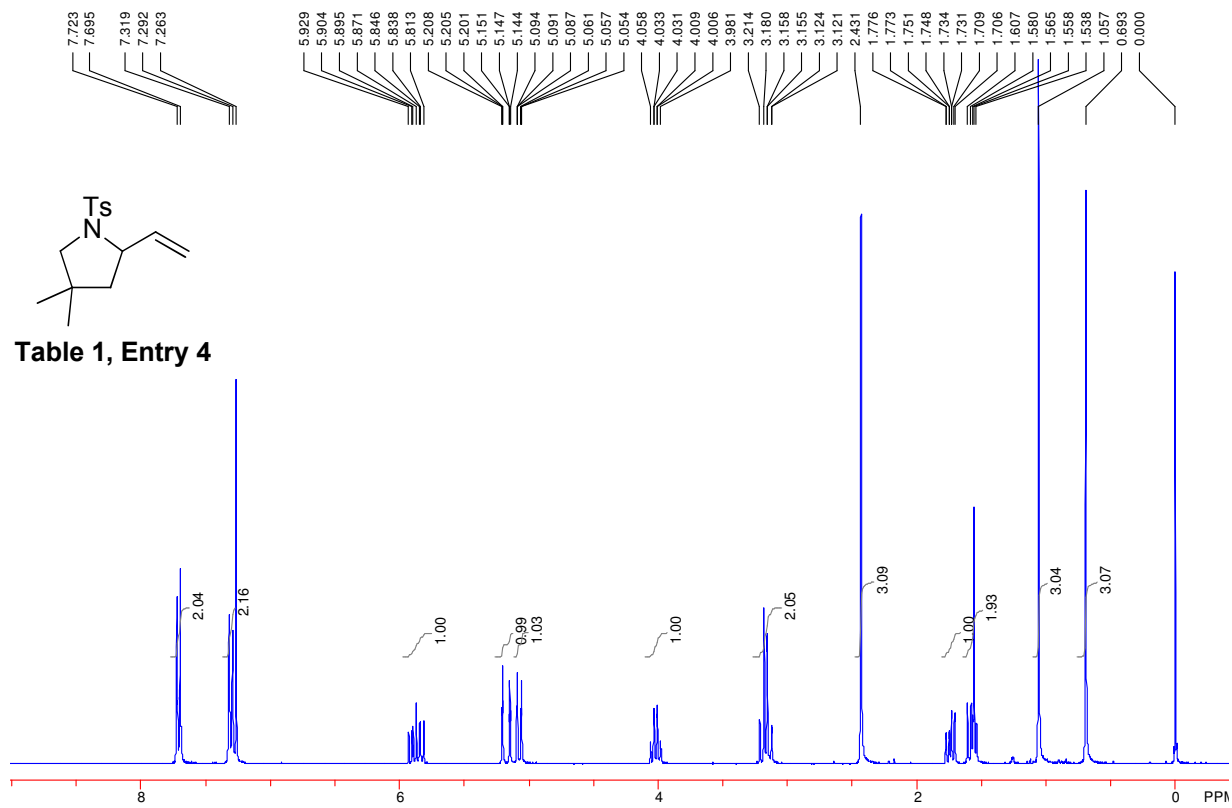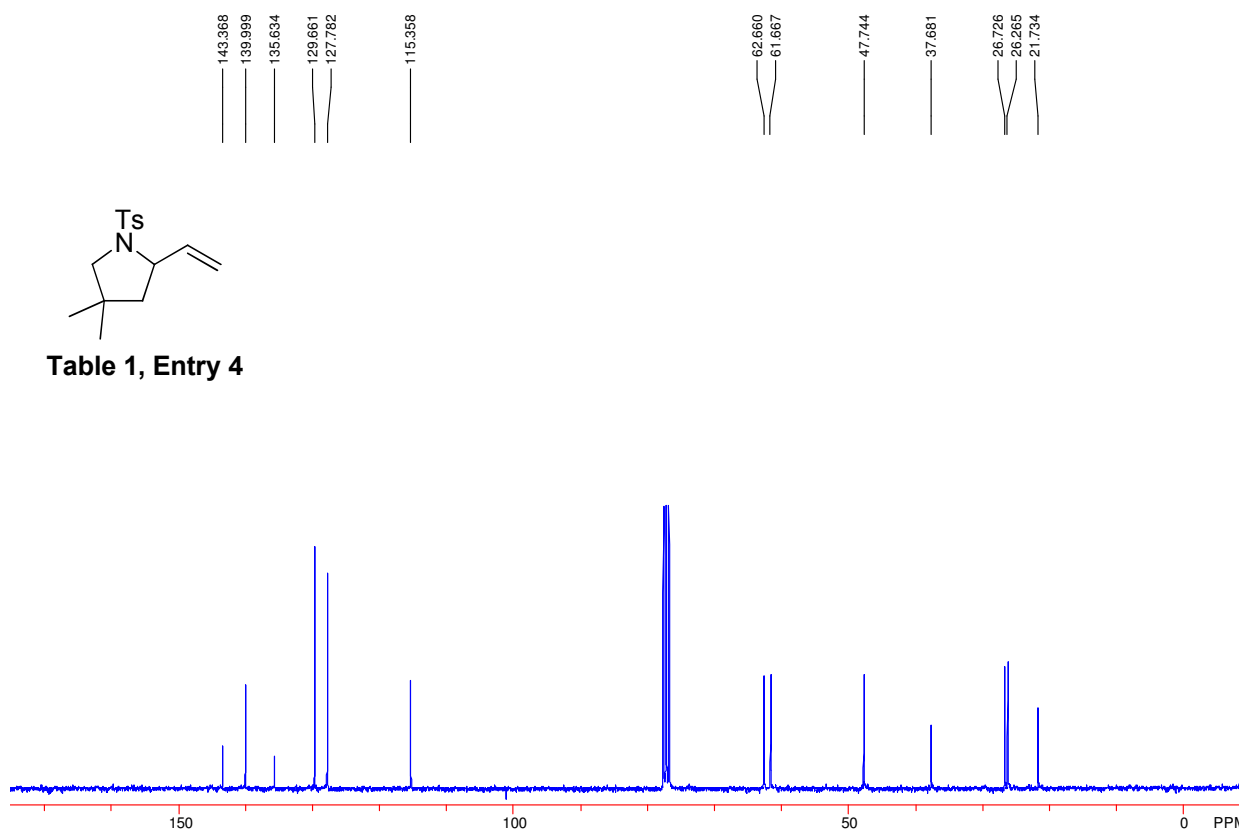

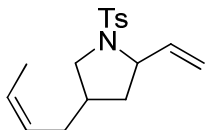

**Table 1, Entry 5**  
mixture of diastereomers  
1.3 : 1 dr

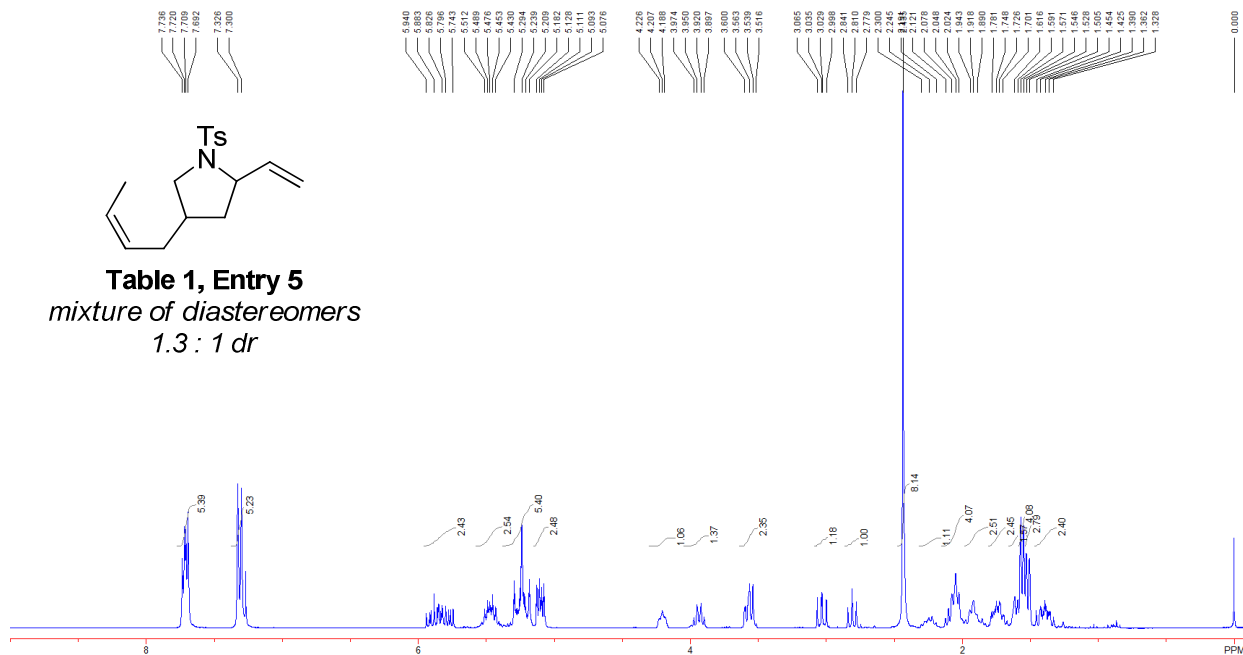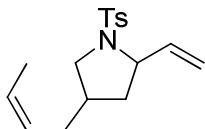

**Table 1, Entry 5**  
mixture of diastereomers

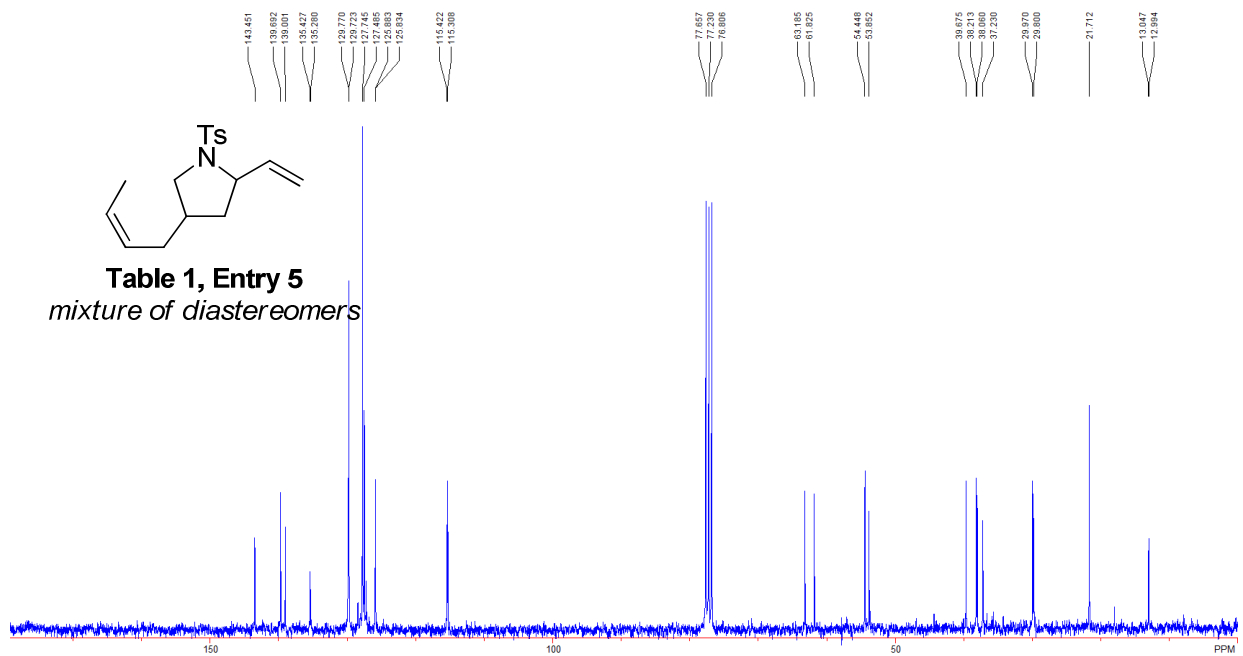

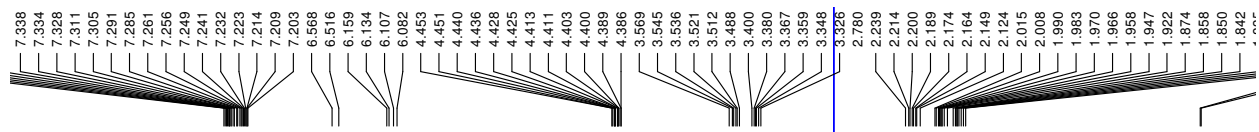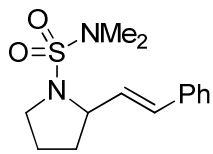

Table 1, Entry 6

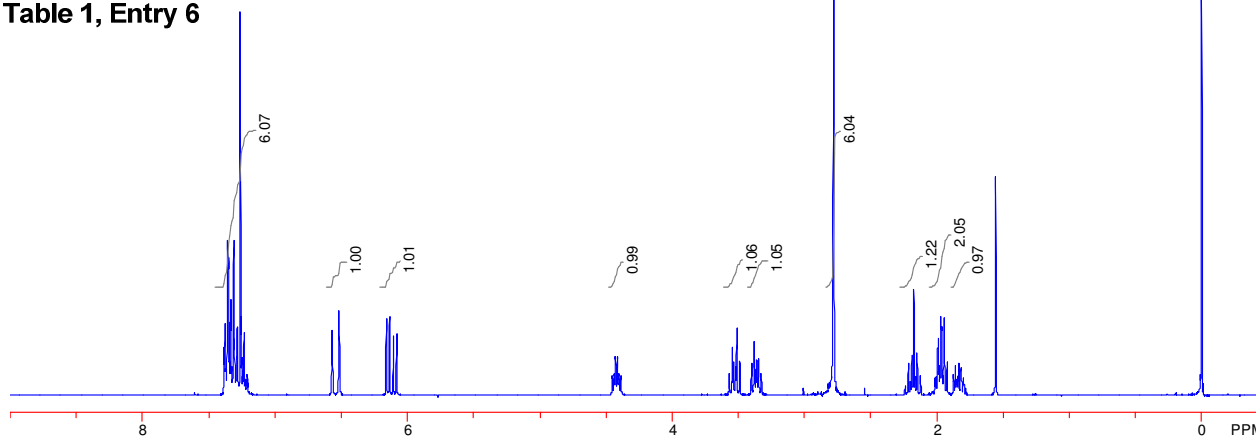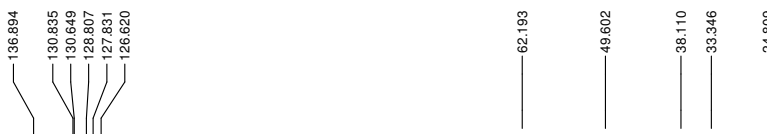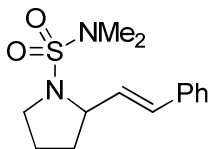

Table 1, Entry 6

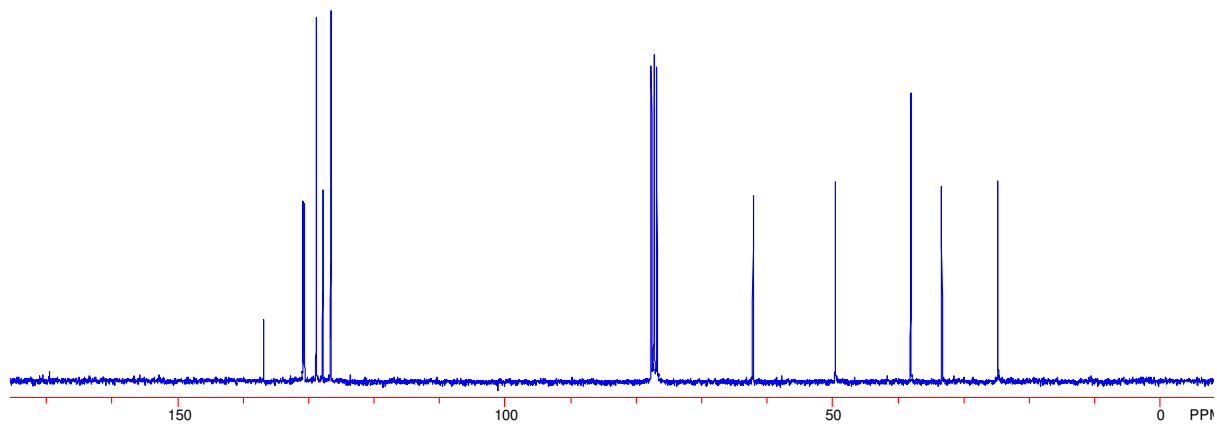



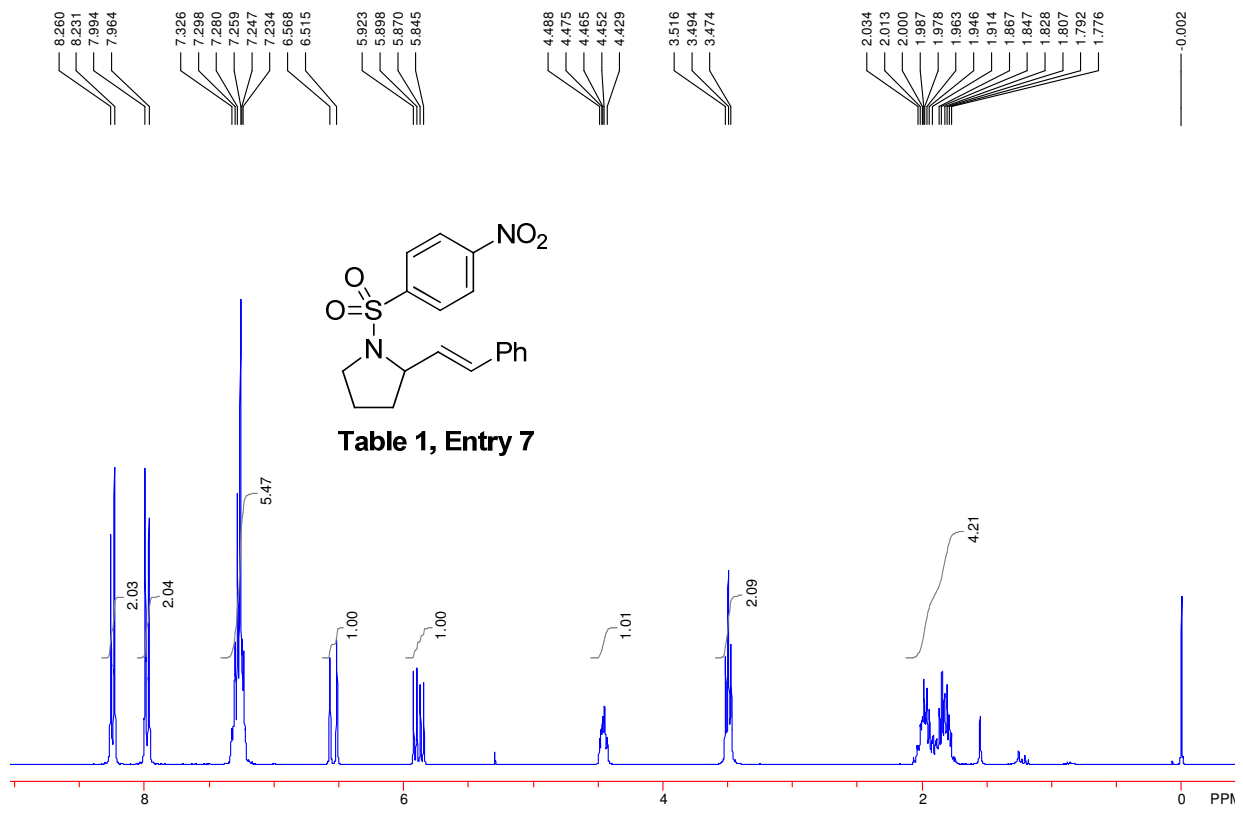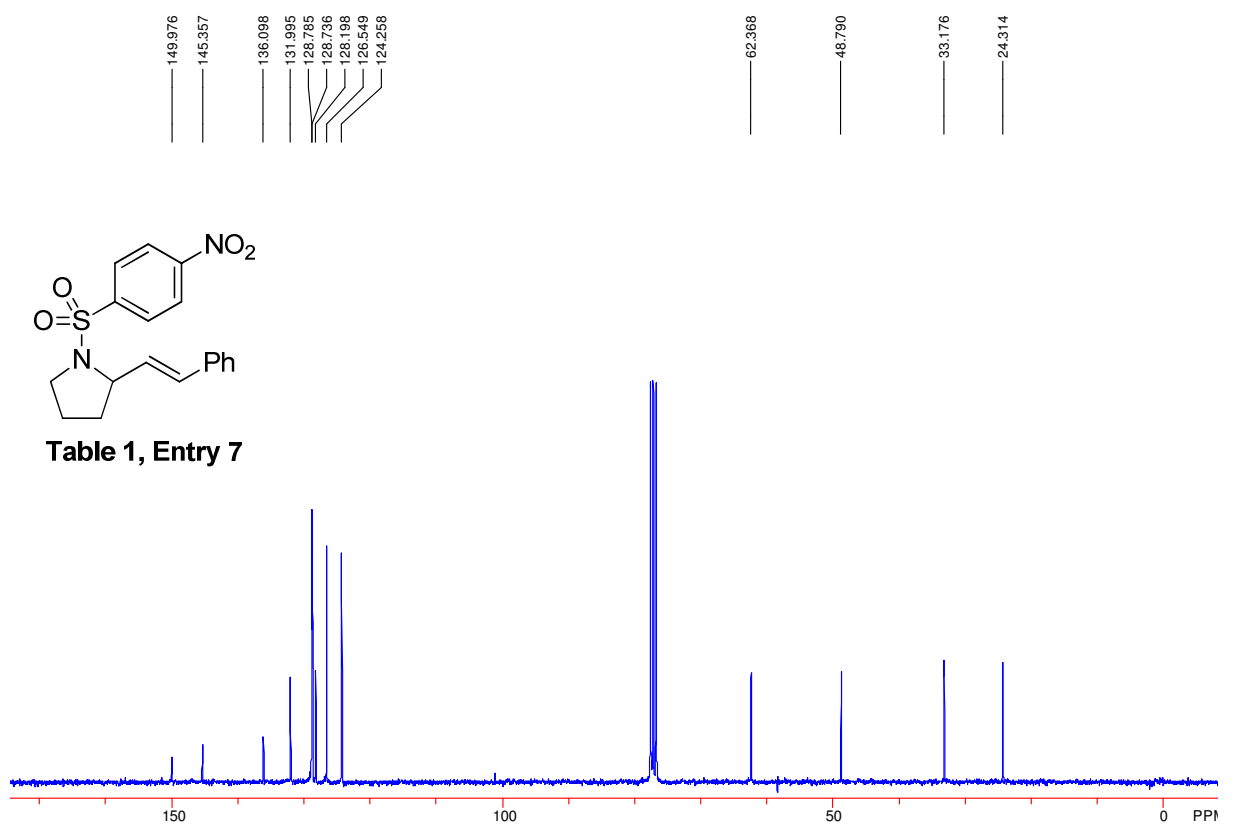

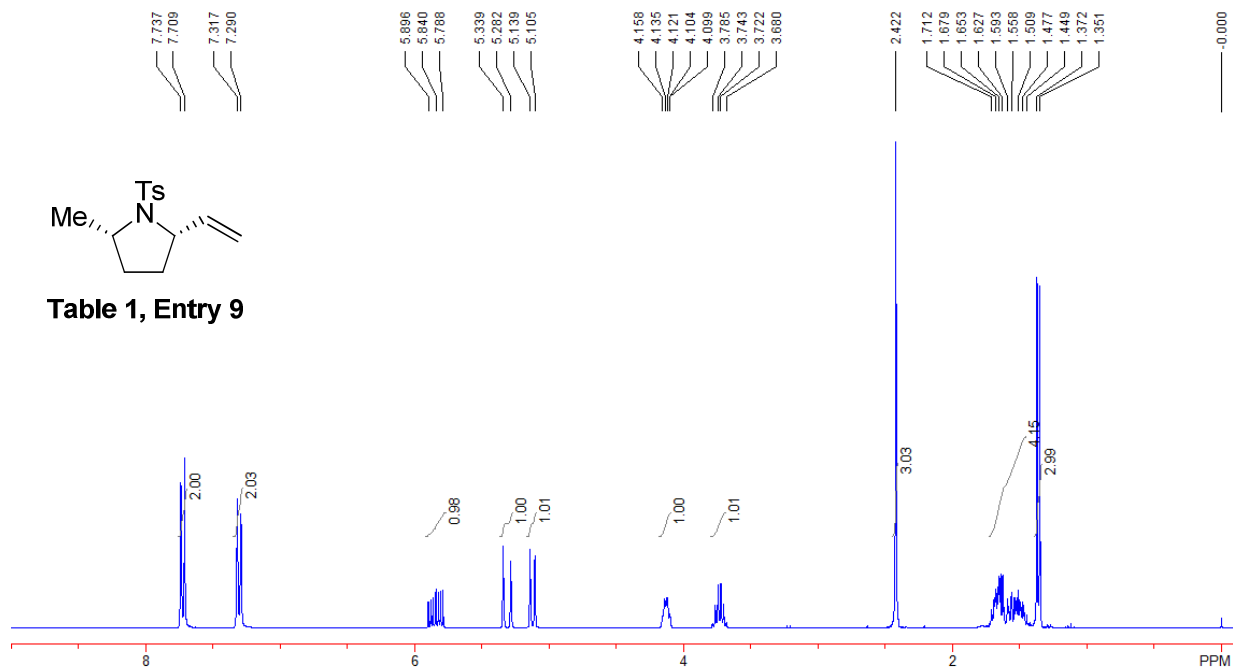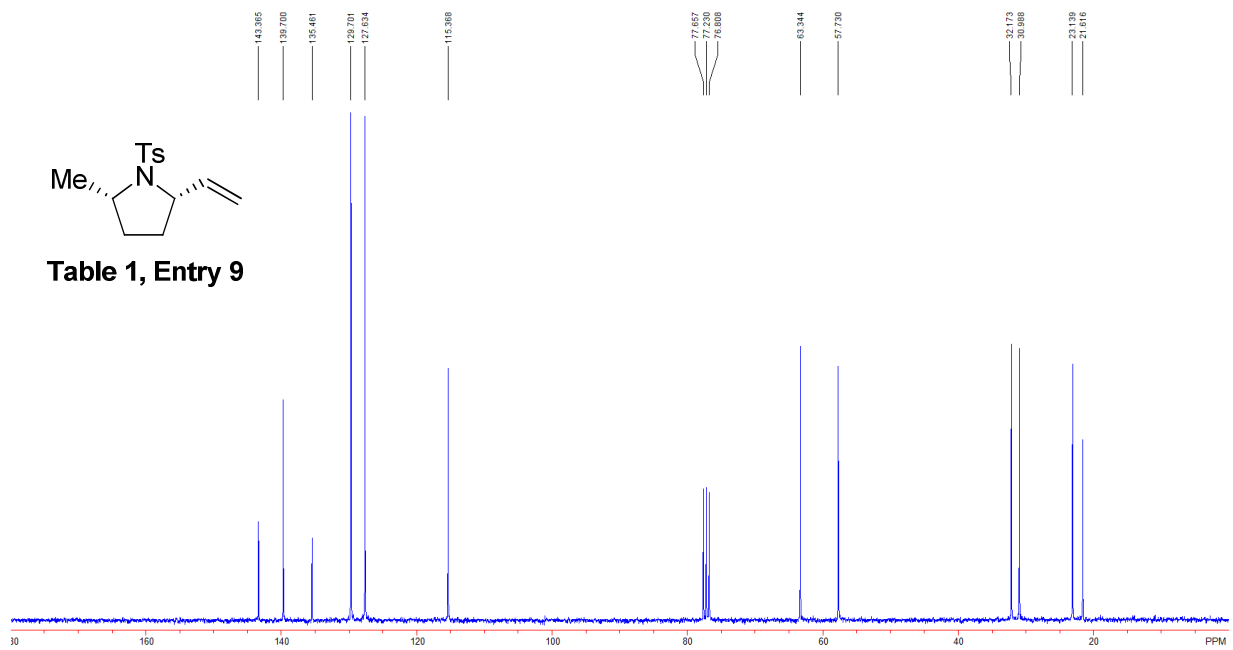

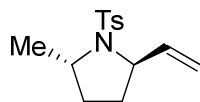

**Table 1, Entry 10**  
mixture of diastereomers  
5:1 dr

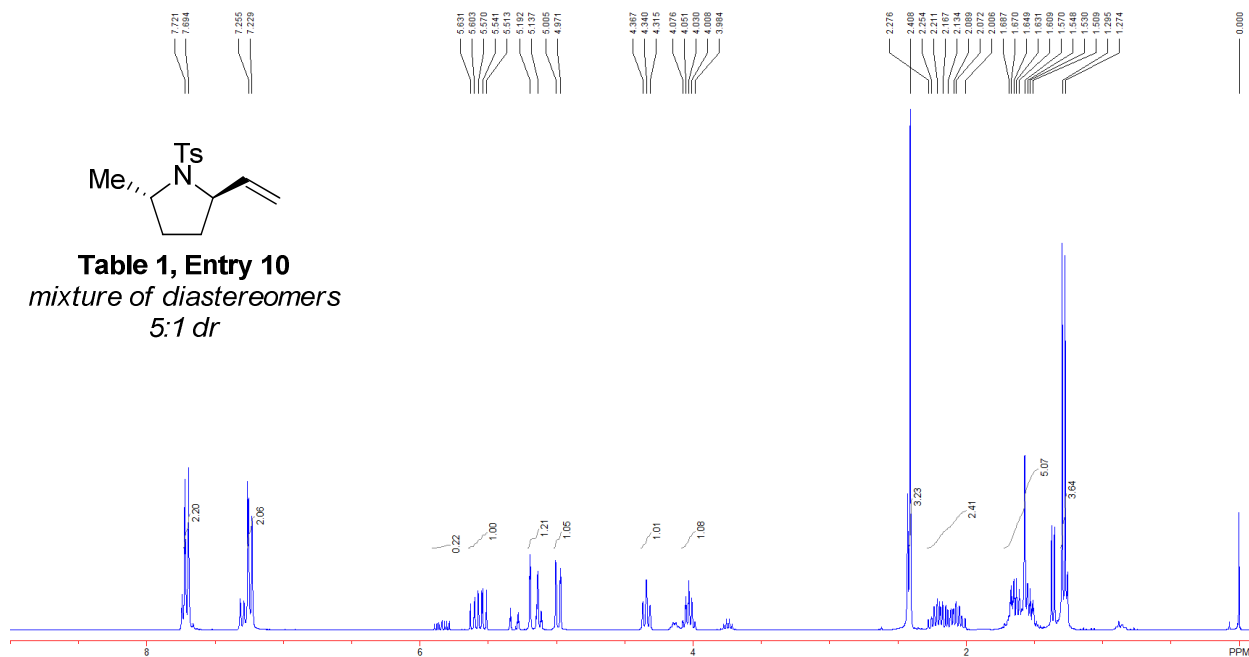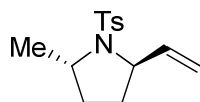

**Table 1, Entry 10**  
mixture of diastereomers  
5:1 dr

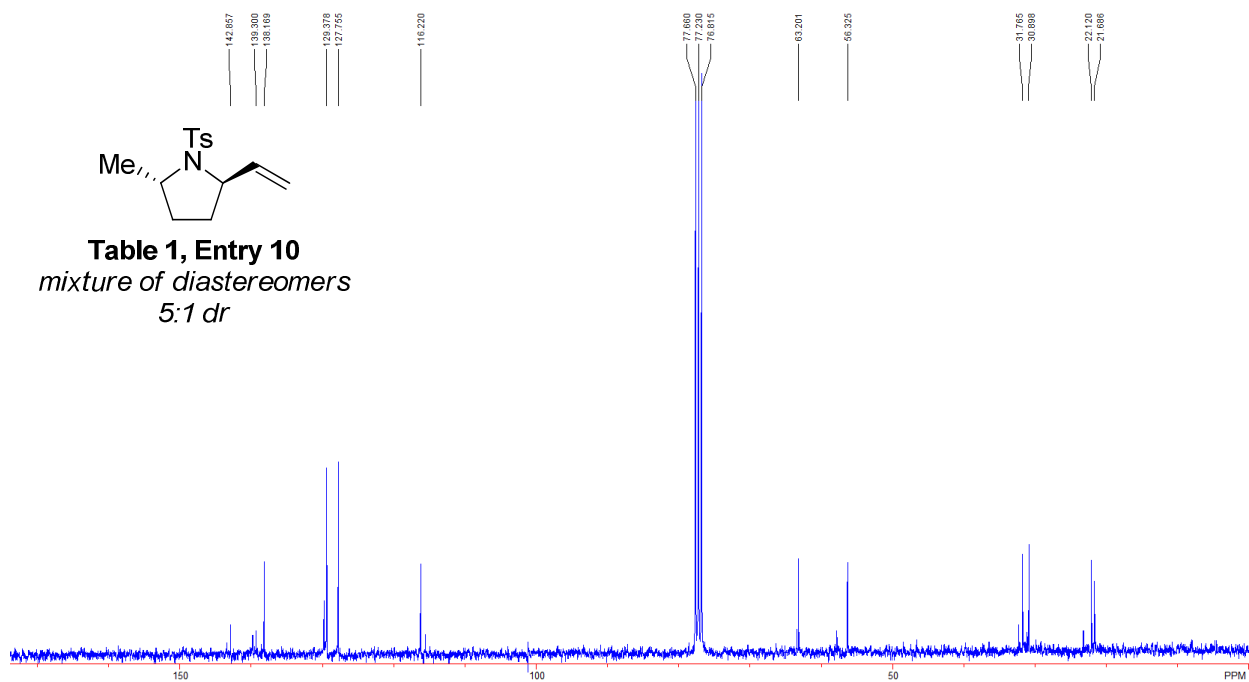

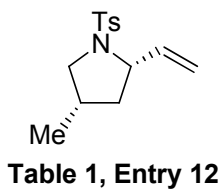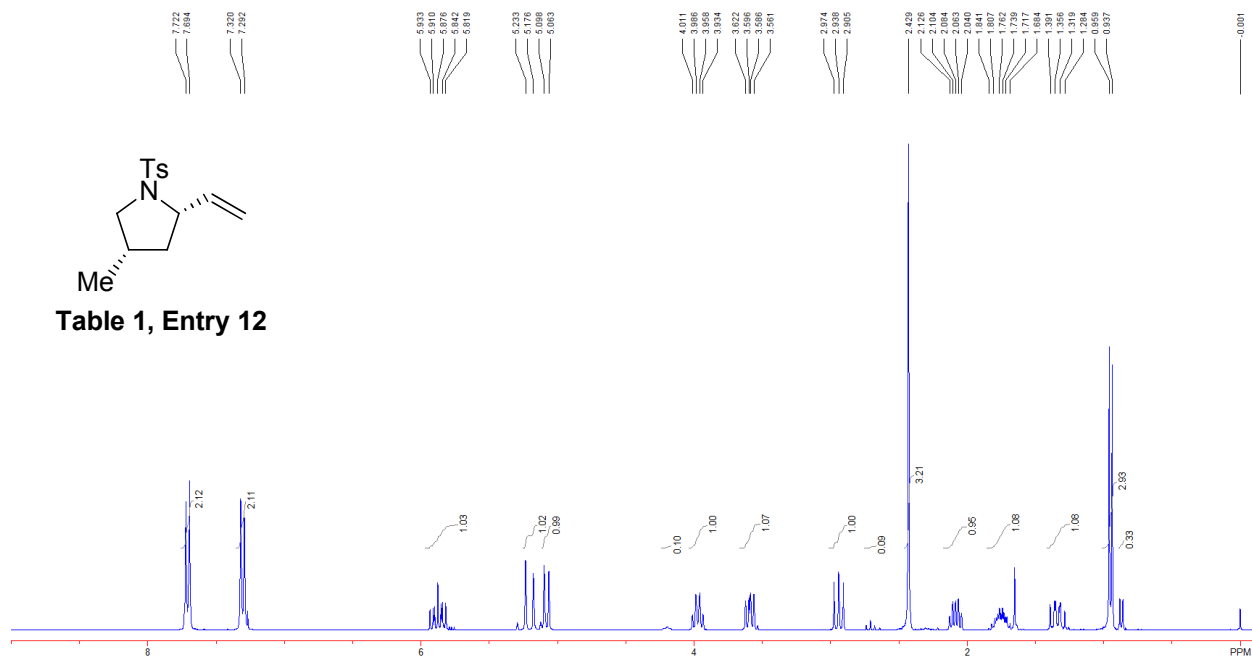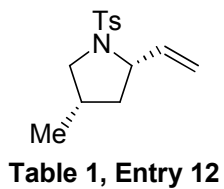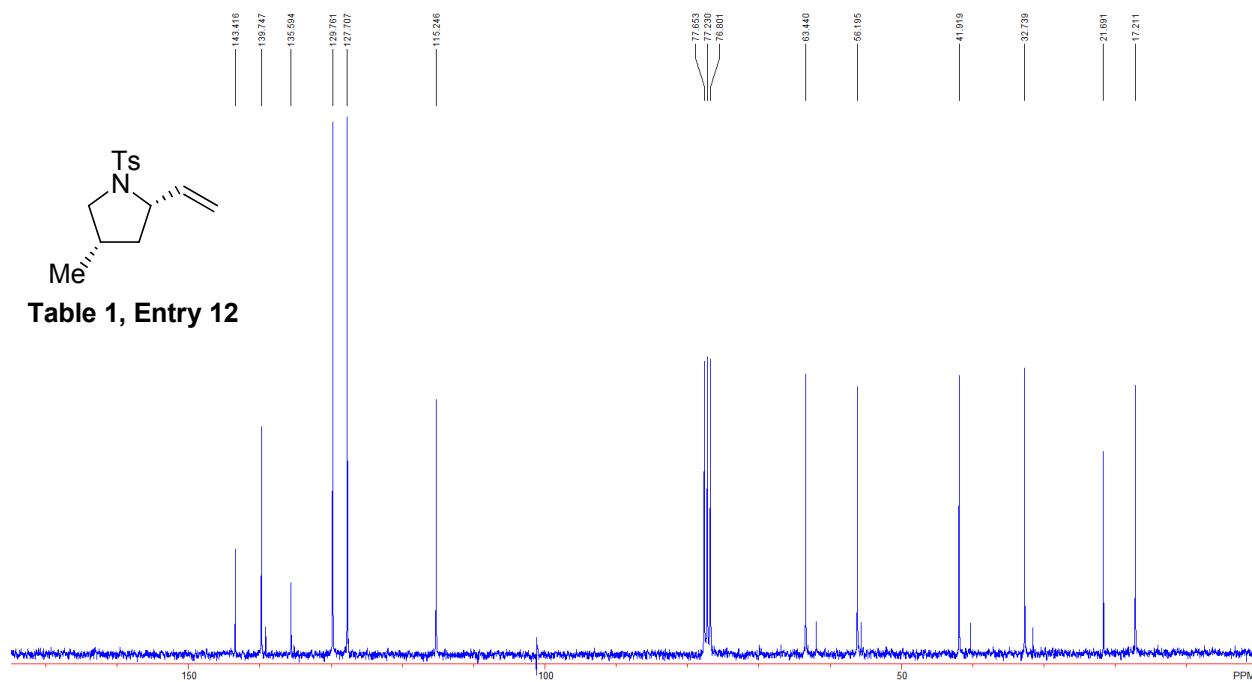

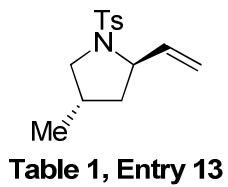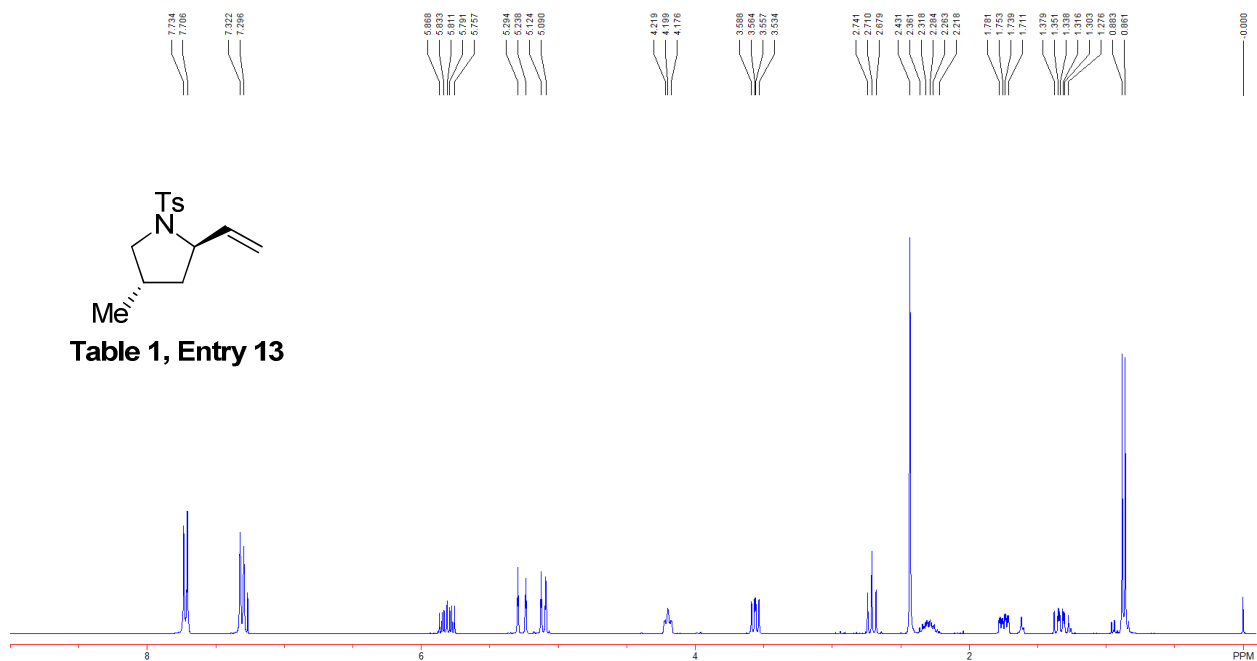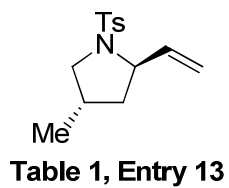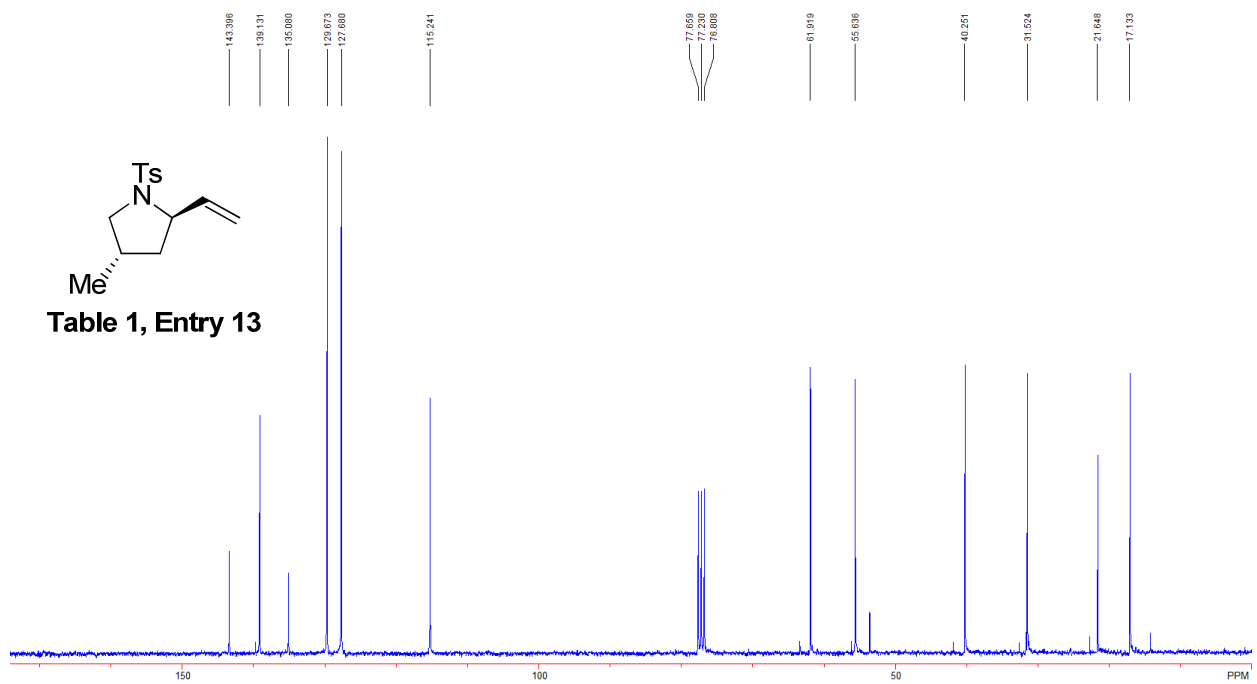

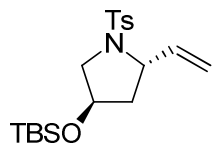

Table 1, Entry 15

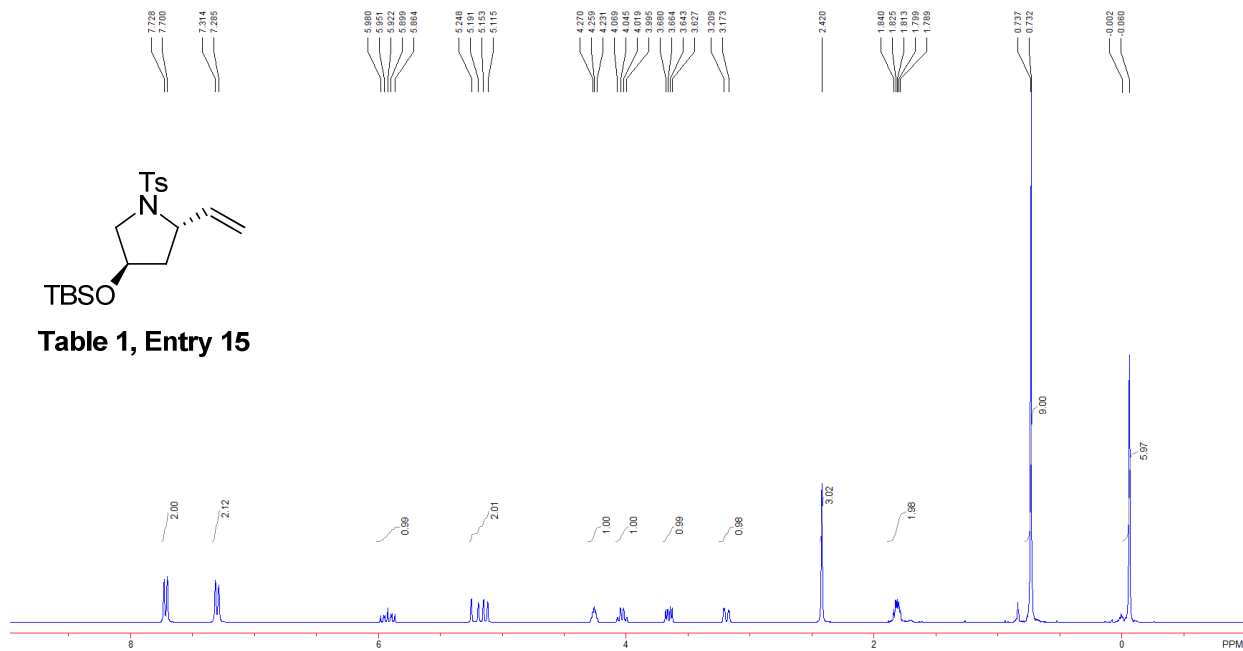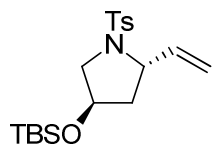

Table 1, Entry 15

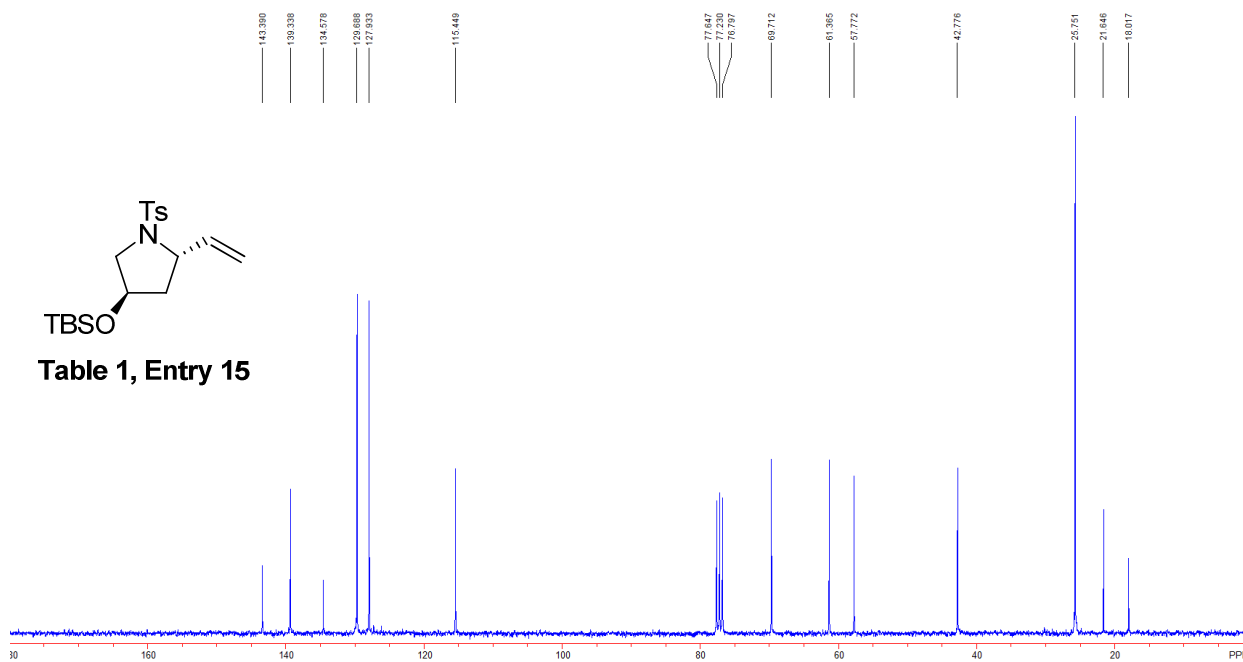

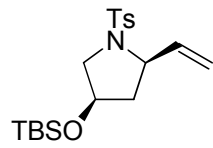

Table 1, Entry 16

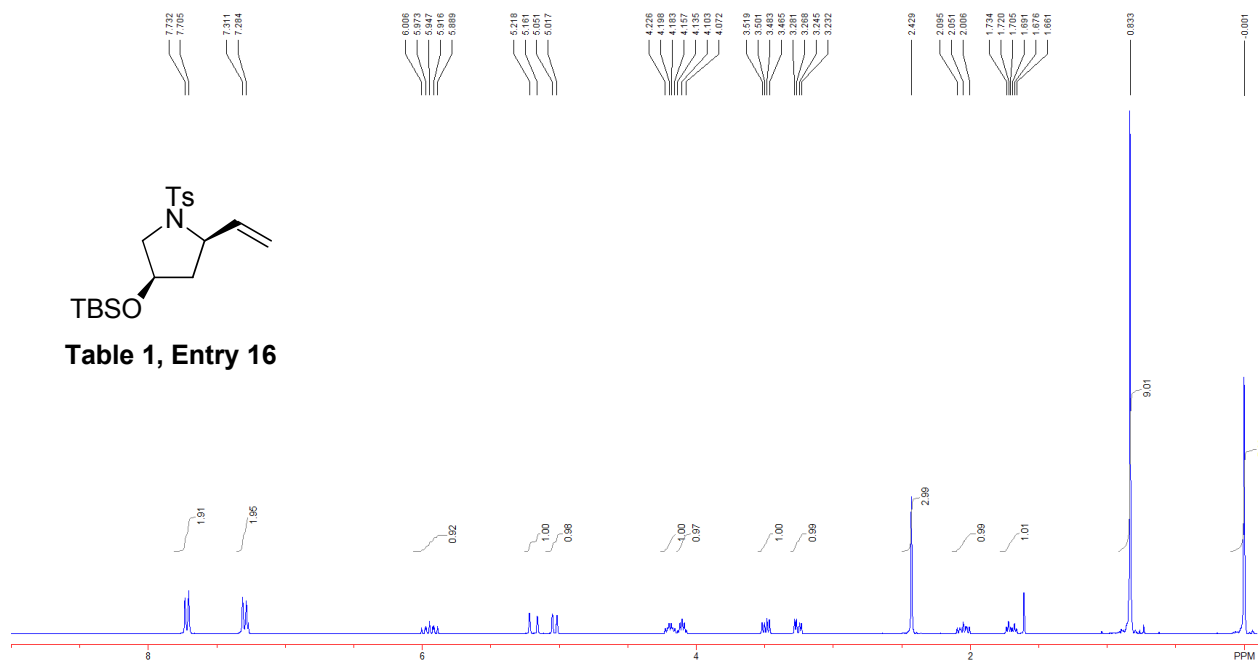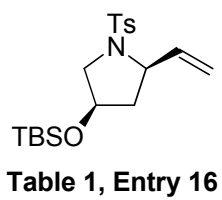

Table 1, Entry 16

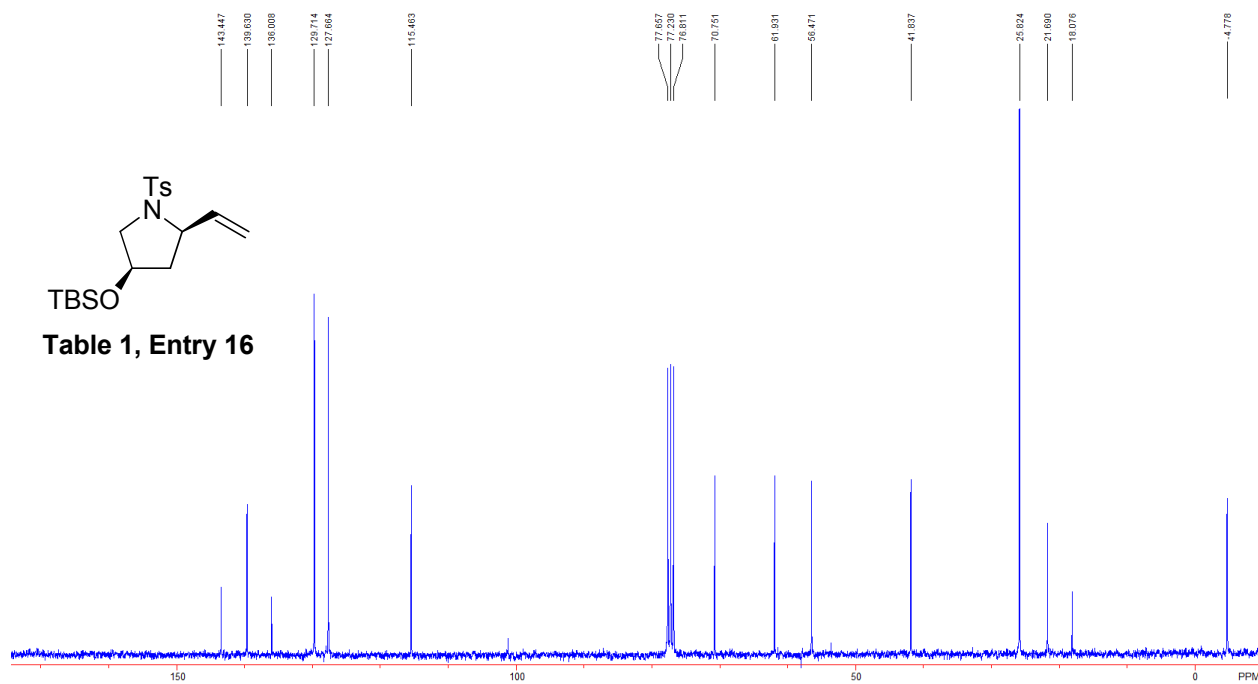

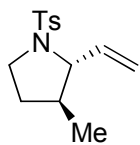

Table 1, Entry 18

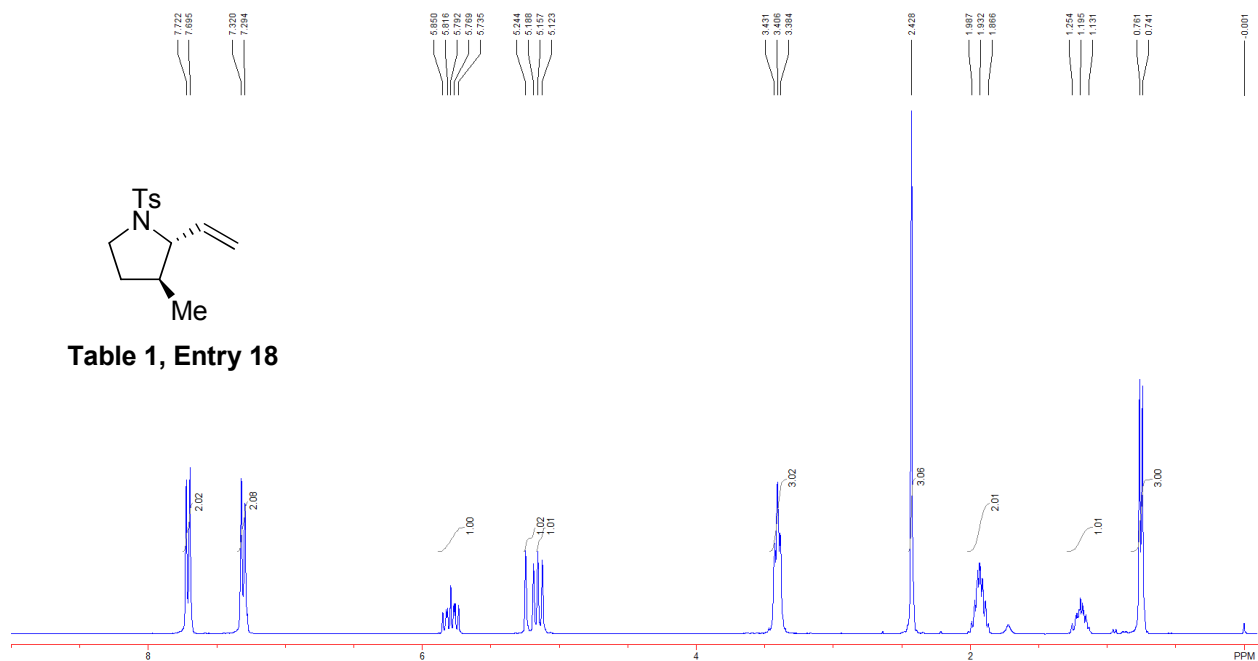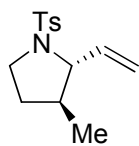

Table 1, Entry 18

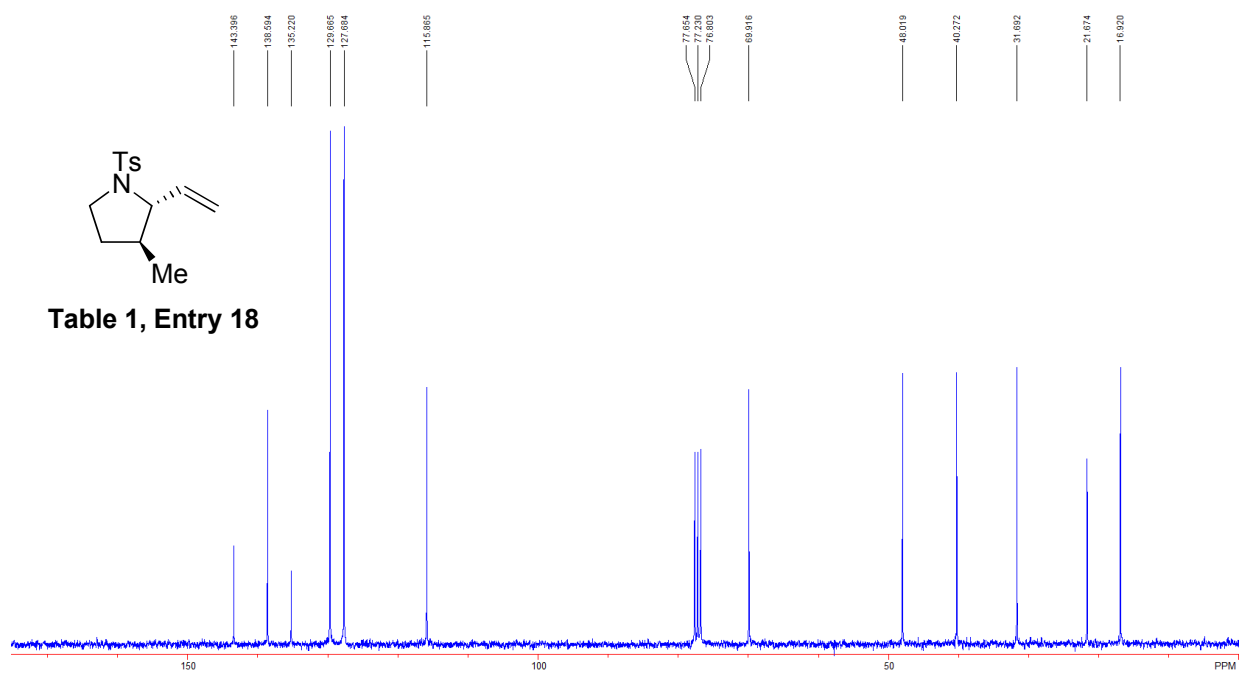

Supplement: NIHMS293520-supplement-2_si_002.pdf [file NIHMS293520-supplement-2_si_002.pdf]
